# Supplementary material for: Genome-wide family prediction unveils molecular mechanisms underlying the regulation of agronomic traits in Urochloa ruziziensis
Source: bioRxiv preprint, doi:10.1101/2023.09.25.559305, version 1 (2023-09-26)
Supplement: Supplementary Tables [file 559305_file03.xlsx]

## Sheet: Table S1
Supplementary Table S1. Estimates of narrow-sense heritability (h²) for all phenotypes, stratified by clippings and assessed at the individual level.
Phenotype	Clipping	Heritability (h²)
Green Matter	2	0.7
	3	0.71
	4	0.73
	5	0.89
	6	0.87
	7	0.87
	8	0.9
	9	0.87
	Total Sum	0.87
Dry Matter	2	0.7
	3	0.54
	4	0.83
	5	0.88
	6	0.87
	7	0.87
	8	0.89
	9	0.86
	Total Sum	0.89
Regrowth	2	0.73
	3	0.86
	4	0.84
	5	0.78
	6	0.67
	7	0.72
	8	0.63
	9	0.63
	Total Sum	0.85
Leaf Dry Matter	2	0.81
	5	0.92
	Total Sum	0.88
Stem Dry Matter	2	0.44
	5	0.84
	Total Sum	0.74

## Sheet: Table S2
Supplementary Table S2. Comparison of model performances assessed by predictive ability and mean squared error, separated according to phenotype and clipping. For each specific combination of trait, clipping, and dataset configuration, a distinct Tukey's test was conducted to compare model performance. The compared datasets encompassed the following: (i) the complete dataset, (ii) markers selecte…
Trait	Clipping	Model	Complete Dataset		FI-1		FI-2		Comparison of Tukey's Test (Predictive Ability)	Complete Dataset		FI-1		FI-2		Comparison of Tukey's Test (Mean Squared Error)
			Predictive Ability	Tukey's Test	Predictive Ability	Tukey's Test	Predictive Ability	Tukey's Test		Mean Squared Error	Tukey's Test	Mean Squared Error	Tukey's Test	Mean Squared Error	Tukey's Test
Green Matter	2	RKHS	0.653172	ab	0.847639	a	0.857405	a	b/a/a	0.0291985	de	0.0172603	e	0.0178439	cd	a/c/b
		BRR	0.624703	bc	0.822343	b	0.836692	bc	b/a/a	0.0304205	d	0.0181619	d	0.0176573	cd	a/b/c
		SVM	0.667529	a	0.84028	a	0.829213	c	b/a/a	0.0286036	e	0.0186942	cd	0.022254	a	a/b/c
		RF	0.606385	c	0.840538	a	0.849613	ab	b/a/a	0.0326981	c	0.0194552	c	0.0182074	bc	a/b/c
		AB	0.551474	d	0.805472	c	0.843508	abc	c/b/a	0.0363229	b	0.0203914	b	0.0170221	d	a/b/c
		MLP	0.540947	d	0.738153	d	0.844782	ab	c/b/a	0.0409548	a	0.0277293	a	0.0192487	b	a/b/c
	3	RKHS	0.743454	a	0.83703	b	0.869805	a	c/b/a	0.0303575	e	0.0209439	c	0.0164412	d	a/b/c
		BRR	0.713864	b	0.81202	c	0.788377	d	c/a/b	0.033149	d	0.0232775	b	0.0265082	b	a/c/b
		SVM	0.748727	a	0.83546	b	0.849798	b	c/b/a	0.0301418	e	0.0216236	c	0.0192001	c	a/c/b
		RF	0.694576	b	0.858491	a	0.868801	a	b/a/a	0.0362847	c	0.0190736	d	0.0168911	d	a/b/c
		AB	0.655646	c	0.864686	a	0.877255	a	b/a/a	0.0391036	b	0.0176322	e	0.0163347	d	a/b/c
		MLP	0.629622	d	0.794273	d	0.809489	c	b/a/a	0.0436259	a	0.0260187	a	0.0286752	a	a/b/c
	4	RKHS	0.847489	a	0.905917	b	0.894197	b	c/a/b	0.0201094	d	0.0139409	c	0.0145865	c	a/c/b
		BRR	0.827782	bc	0.874068	c	0.855139	c	c/a/b	0.0219449	c	0.016528	b	0.0195807	b	a/c/b
		SVM	0.839048	ab	0.900585	b	0.895223	b	b/a/a	0.0219171	c	0.0168133	b	0.0148833	c	a/c/b
		RF	0.829434	abc	0.923444	a	0.911772	a	c/a/b	0.0228405	bc	0.0108562	d	0.0130488	d	a/c/b
		AB	0.819206	c	0.930345	a	0.901628	ab	c/a/b	0.0230537	b	0.00986796	e	0.0143328	cd	a/c/b
		MLP	0.739075	d	0.862715	d	0.829289	d	c/a/b	0.0324974	a	0.0177866	a	0.0259651	a	a/c/b
	5	RKHS	0.84337	a	0.908798	b	0.866353	c	c/a/b	0.0178701	d	0.012449	c	0.0159826	bc	a/c/b
		BRR	0.823318	b	0.87698	c	0.853865	cd	c/a/b	0.0190641	c	0.0145512	b	0.0191638	b	a/b/a
		SVM	0.832937	ab	0.901974	b	0.842906	d	b/a/b	0.0201734	b	0.0148994	b	0.0181573	bc	a/b/a
		RF	0.839147	ab	0.931499	a	0.91746	a	c/a/b	0.0185409	cd	0.00986794	d	0.0118885	c	a/c/b
		AB	0.826608	ab	0.926947	a	0.891517	b	c/a/b	0.0188701	c	0.0105631	d	0.0149965	bc	a/c/b
		MLP	0.734722	c	0.853962	d	0.733794	e	b/a/b	0.0278554	a	0.0160749	a	0.069222	a	a/c/b
	6	RKHS	0.826054	a	0.884859	b	0.862953	b	c/a/b	0.0204588	d	0.0152581	c	0.0184724	c	a/c/b
		BRR	0.797616	b	0.857701	c	0.844911	c	c/a/b	0.0229865	b	0.017388	b	0.018814	c	a/c/b
		SVM	0.824312	a	0.877916	b	0.842849	c	c/a/b	0.0216855	c	0.0174765	b	0.0215909	b	a/c/b
		RF	0.81608	ab	0.92595	a	0.902553	a	c/a/b	0.0217712	c	0.00993839	d	0.0118308	e	a/c/b
		AB	0.807398	ab	0.921778	a	0.888484	a	c/a/b	0.0222719	bc	0.00964999	d	0.013215	d	a/c/b
		MLP	0.711002	c	0.795617	d	0.813113	d	b/a/a	0.0316766	a	0.0245103	a	0.0235989	a	a/c/b
	7	RKHS	0.795065	a	0.889173	b	0.84405	b	c/a/b	0.0228898	cd	0.0143562	c	0.0186401	c	a/c/b
		BRR	0.782649	a	0.853377	c	0.808756	c	c/a/b	0.0238493	bc	0.0171141	b	0.0218231	b	a/c/b
		SVM	0.792746	a	0.87858	b	0.821677	c	c/a/b	0.0243458	b	0.0169016	b	0.0213792	b	a/c/b
		RF	0.794848	a	0.920512	a	0.922844	a	b/a/a	0.023277	cd	0.0107654	d	0.0103574	e	a/b/b
		AB	0.792622	a	0.91108	a	0.909359	a	b/a/a	0.0223893	d	0.010938	d	0.0120886	d	a/c/b
		MLP	0.669687	b	0.840707	c	0.732	d	c/a/b	0.0351409	a	0.0179877	a	0.0342306	a	a/c/b
	8	RKHS	0.85777	a	0.92705	ab	0.880799	b	c/a/b	0.0247353	e	0.0140651	c	0.0203672	c	a/c/b
		BRR	0.840219	a	0.902465	d	0.818097	d	b/a/c	0.0265293	cd	0.0169244	a	0.0301169	a	b/c/a
		SVM	0.856503	a	0.920568	bc	0.872621	bc	c/a/b	0.0259586	d	0.0167275	a	0.0207593	c	b/c/a
		RF	0.848429	a	0.93199	a	0.912903	a	c/a/b	0.0273411	bc	0.012654	d	0.0151523	d	a/c/b
		AB	0.8389	a	0.931719	a	0.917474	a	c/a/b	0.0279119	b	0.0124183	d	0.0141419	d	a/c/b
		MLP	0.777768	b	0.911041	cd	0.857994	c	c/a/b	0.0363039	a	0.0155426	b	0.0243031	b	a/c/b
	9	RKHS	0.799296	a	0.877049	b	0.897492	c	c/b/a	0.0230963	cd	0.015562	c	0.0121958	d	a/b/c
		BRR	0.791731	a	0.862245	c	0.865727	d	b/a/a	0.0236417	bcd	0.0163148	b	0.0164597	b	a/b/b
		SVM	0.798528	a	0.868196	bc	0.888007	c	c/b/a	0.0244979	b	0.0175087	a	0.0140775	c	a/b/b
		RF	0.801609	a	0.919859	a	0.944029	a	c/b/a	0.0226096	d	0.0110621	d	0.00778391	f	a/b/c
		AB	0.790335	a	0.91234	a	0.930806	b	c/b/a	0.0239822	bc	0.0109656	d	0.00905164	e	a/b/c
		MLP	0.681507	b	0.847891	d	0.83561	e	b/a/a	0.0349688	a	0.0168582	ab	0.0230474	a	a/b/c
	Total Sum	RKHS	0.807318	a	0.878994	b	0.86722	c	b/a/a	0.0249697	d	0.0171722	d	0.0177513	d	a/c/b
		BRR	0.792528	a	0.840495	c	0.852199	d	c/b/a	0.0263184	bc	0.0207496	b	0.0193457	c	a/b/c
		SVM	0.805749	a	0.87236	b	0.842977	d	c/a/b	0.0259131	bcd	0.0193374	c	0.0212223	b	a/b/c
		RF	0.794961	a	0.918701	a	0.937331	a	c/b/a	0.0268845	b	0.0117861	e	0.00923037	f	a/b/c
		AB	0.795651	a	0.91483	a	0.919765	b	b/a/a	0.0255977	cd	0.011765	e	0.0115043	e	a/b/b
		MLP	0.7038	b	0.8088	d	0.76861	e	c/a/b	0.0370585	a	0.0242732	a	0.0356232	a	a/b/b
Trait	Clipping	Model	Complete Dataset		FI-1		FI-2		Comparison of Tukey's Test (Predictive Ability)	Complete Dataset		FI-1		FI-2		Comparison of Tukey's Test (Mean Squared Error)
			Predictive Ability	Tukey's Test	Predictive Ability	Tukey's Test	Predictive Ability	Tukey's Test		Mean Squared Error	Tukey's Test	Mean Squared Error	Tukey's Test	Mean Squared Error	Tukey's Test
Dry Matter	2	RKHS	0.601463	a	0.851097	ab	0.53723	c	b/a/c	0.032801	d	0.0175558	d	0.0438823	c	b/c/a
		BRR	0.58032	ab	0.866327	a	0.606487	b	c/a/b	0.0338581	d	0.0150264	e	0.0385227	d	b/c/a
		SVM	0.604046	a	0.84272	b	0.447465	d	b/a/c	0.0328523	d	0.0199477	c	0.0491028	b	b/c/a
		RF	0.547305	bc	0.794534	cd	0.638167	b	c/a/b	0.0372933	c	0.0229232	a	0.0346354	d	a/c/b
		AB	0.518281	cd	0.788925	d	0.697851	a	c/a/b	0.0389441	b	0.0215582	b	0.0294065	e	a/c/b
		MLP	0.504576	d	0.810097	c	0.379845	e	b/a/c	0.0449112	a	0.0194938	c	0.0910482	a	a/c/b
	3	RKHS	0.754469	a	0.850772	a	0.80186	b	c/a/b	0.0147324	d	0.0114914	d	0.0135934	b	a/c/b
		BRR	0.732146	ab	0.80098	b	0.799232	b	b/a/a	0.0154461	cd	0.0137935	c	0.0136392	b	a/b/b
		SVM	0.750331	a	0.813522	b	0.808421	b	b/a/a	0.0174619	b	0.0158127	b	0.0145146	b	a/b/b
		RF	0.730905	ab	0.855592	a	0.84014	a	c/a/b	0.0161344	c	0.0119055	d	0.0134357	b	a/c/b
		AB	0.715234	b	0.863408	a	0.807912	b	c/a/b	0.0152667	d	0.0107482	e	0.0189752	b	b/c/a
		MLP	0.565856	c	0.701773	c	0.692365	c	b/a/a	0.0262857	a	0.019702	a	0.0479755	a	b/c/a
	4	RKHS	0.868606	a	0.930335	a	0.934781	ab	b/a/a	0.0185825	d	0.0116293	c	0.0101573	d	a/b/c
		BRR	0.845252	c	0.898495	c	0.892231	c	b/a/a	0.0208973	c	0.0144727	b	0.015843	b	a/c/b
		SVM	0.864534	ab	0.915423	b	0.927077	b	c/b/a	0.0198131	c	0.0140573	b	0.0113758	c	a/c/b
		RF	0.847424	bc	0.931563	a	0.941429	a	c/b/a	0.0229215	b	0.010347	d	0.00899879	e	a/b/c
		AB	0.833105	c	0.931754	a	0.934712	ab	b/a/a	0.0228301	b	0.00989873	d	0.00932284	e	a/b/b
		MLP	0.7735	d	0.884158	d	0.893524	c	b/a/a	0.0304639	a	0.016751	a	0.0173352	a	a/b/b
	5	RKHS	0.841272	a	0.913228	b	0.881676	ab	c/a/b	0.01727	c	0.0113701	d	0.014318	c	a/c/b
		BRR	0.816079	b	0.881253	c	0.877886	ab	b/a/a	0.0188796	b	0.0135441	b	0.0146833	bc	a/c/b
		SVM	0.830585	ab	0.905491	b	0.84715	c	c/a/b	0.0191888	b	0.0126299	c	0.0181516	bc	a/c/b
		RF	0.836437	a	0.933457	a	0.895157	a	c/a/b	0.0183578	b	0.00889233	e	0.0199728	b	a/c/b
		AB	0.826402	ab	0.934071	a	0.867996	b	c/a/b	0.0183764	b	0.00896692	e	0.0145825	c	b/c/a
		MLP	0.722185	c	0.841983	d	0.685838	d	b/a/c	0.0277278	a	0.016751	a	0.0486929	a	b/c/a
	6	RKHS	0.828869	a	0.899737	b	0.883823	b	c/a/b	0.0213348	c	0.0139633	c	0.0158005	c	a/c/b
		BRR	0.811906	a	0.88145	c	0.855521	d	c/a/b	0.0229548	b	0.0156802	b	0.0186966	b	a/c/b
		SVM	0.828359	a	0.897071	b	0.871116	c	c/a/b	0.022565	b	0.0154492	b	0.0186778	b	a/c/b
		RF	0.819103	a	0.927978	a	0.917158	a	b/a/a	0.0226282	b	0.0102576	d	0.0106127	d	a/b/b
		AB	0.813086	a	0.92524	a	0.916266	a	b/a/a	0.0223812	b	0.010122	d	0.010916	d	a/c/b
		MLP	0.731997	b	0.87109	c	0.846309	d	c/a/b	0.032222	a	0.0165058	a	0.0219251	a	a/c/b
	7	RKHS	0.793754	a	0.875436	b	0.848646	b	c/a/b	0.0212379	b	0.0149837	d	0.0174229	b	a/c/b
		BRR	0.781827	a	0.821253	c	0.838076	b	c/b/a	0.0221483	b	0.0189751	b	0.0179834	b	a/b/c
		SVM	0.793754	a	0.864344	b	0.854015	b	b/a/a	0.0219987	b	0.016974	c	0.0165166	b	a/b/c
		RF	0.78851	a	0.91549	a	0.912599	a	b/a/a	0.0219069	b	0.0110497	e	0.0112721	c	a/b/b
		AB	0.788466	a	0.919924	a	0.899554	a	c/a/b	0.021567	b	0.0100087	f	0.0123326	c	a/c/b
		MLP	0.660588	b	0.796444	d	0.711523	c	c/a/b	0.0341044	a	0.0212014	a	0.0468682	a	a/c/b
	8	RKHS	0.875176	a	0.936539	bc	0.910802	a	c/a/b	0.0207949	d	0.0117074	d	0.016363	c	a/c/b
		BRR	0.855145	a	0.907623	d	0.9075	ab	b/a/a	0.0231438	c	0.0152485	b	0.0162575	c	a/c/b
		SVM	0.871107	a	0.927454	c	0.897048	b	c/a/b	0.0221289	c	0.014413	c	0.0198032	b	a/c/b
		RF	0.859679	a	0.950206	a	0.915231	a	c/a/b	0.024805	b	0.00900828	e	0.0164935	c	a/c/b
		AB	0.865143	a	0.946369	ab	0.894828	b	c/a/b	0.0226468	c	0.00881096	e	0.020745	b	a/c/b
		MLP	0.790315	b	0.90378	d	0.79949	c	b/a/b	0.0322419	a	0.0162049	a	0.0505999	a	a/c/b
	9	RKHS	0.791862	a	0.885396	bc	0.786686	b	b/a/b	0.0228987	c	0.0145853	c	0.0220109	c	a/c/b
		BRR	0.781851	a	0.860761	d	0.752084	c	b/a/c	0.0236254	c	0.0160734	b	0.0269696	b	b/c/a
		SVM	0.788146	a	0.874557	c	0.776171	b	b/a/b	0.0249185	b	0.0181067	a	0.0227035	bc	b/c/a
		RF	0.791457	a	0.912795	a	0.925005	a	c/b/a	0.0236213	c	0.012154	e	0.0107651	d	a/b/c
		AB	0.782254	a	0.896286	b	0.934556	a	c/b/a	0.0226517	c	0.0129827	d	0.00940584	d	a/b/c
		MLP	0.670783	b	0.835421	e	0.582384	d	b/a/c	0.0345176	a	0.0178762	a	0.0633972	a	a/b/c
	Total Sum	RKHS	0.835306	a	0.916407	b	0.911897	c	b/a/a	0.0210838	c	0.0126121	c	0.0127867	d	a/b/b
		BRR	0.820469	a	0.884915	d	0.894562	d	b/a/a	0.0224529	b	0.0157095	b	0.0145344	c	a/b/c
		SVM	0.833008	a	0.904366	c	0.896216	d	b/a/a	0.0226418	b	0.0154885	b	0.016081	b	a/b/c
		RF	0.829608	a	0.934062	a	0.943396	a	b/a/a	0.022464	b	0.00990208	d	0.010271	e	a/b/c
		AB	0.824825	a	0.933531	a	0.931344	b	b/a/a	0.0212935	c	0.00940213	d	0.00854116	f	a/c/b
		MLP	0.739817	b	0.876491	d	0.878956	e	b/a/a	0.032675	a	0.0164477	a	0.0255761	a	a/c/b
Trait	Clipping	Model	Complete Dataset		FI-1		FI-2		Comparison of Tukey's Test (Predictive Ability)	Complete Dataset		FI-1		FI-2		Comparison of Tukey's Test (Mean Squared Error)
			Predictive Ability	Tukey's Test	Predictive Ability	Tukey's Test	Predictive Ability	Tukey's Test		Mean Squared Error	Tukey's Test	Mean Squared Error	Tukey's Test	Mean Squared Error	Tukey's Test
Regrowth	2	RKHS	0.638775	a	0.851321	b	0.867736	b	c/b/a	0.0368251	d	0.0187324	c	0.0151588	c	a/b/c
		BRR	0.593918	b	0.843209	b	0.820764	c	c/a/b	0.0402481	c	0.018063	c	0.0212025	b	a/c/b
		SVM	0.647884	a	0.843349	b	0.828233	c	b/a/a	0.035952	d	0.0211869	a	0.0209427	b	a/c/b
		RF	0.590951	b	0.857399	b	0.896266	a	c/b/a	0.0409677	c	0.0195453	b	0.0139974	d	a/b/c
		AB	0.555983	c	0.808494	c	0.896288	a	b/a/a	0.0433574	b	0.0146724	d	0.0125722	e	a/b/c
		MLP	0.493146	d	0.808494	c	0.818562	c	b/a/a	0.0495259	a	0.0217475	a	0.0248314	a	a/b/c
	3	RKHS	0.873407	ab	0.94607	a	0.939552	b	c/a/b	0.0233386	d	0.0110483	c	0.0112311	d	a/b/b
		BRR	0.878167	a	0.932432	b	0.904973	c	c/a/b	0.0216078	e	0.0127806	b	0.017374	b	a/c/b
		SVM	0.870163	ab	0.930136	b	0.933707	b	b/a/a	0.0249467	c	0.0155384	a	0.0153657	c	a/c/b
		RF	0.861456	b	0.946168	a	0.956415	a	c/b/a	0.0261776	b	0.0101979	d	0.00810197	e	a/b/c
		AB	0.845481	c	0.950318	a	0.957391	a	b/a/a	0.0263358	b	0.00898084	e	0.00791615	e	a/b/c
		MLP	0.82042	d	0.922779	c	0.867199	d	c/a/b	0.0324291	a	0.0150215	a	0.0274131	a	a/b/c
	4	RKHS	0.796087	a	0.906898	b	0.859337	b	c/a/b	0.0230475	c	0.0124626	b	0.016871	c	a/c/b
		BRR	0.800236	a	0.898652	b	0.842287	c	c/a/b	0.0219163	d	0.0114843	c	0.0190831	b	a/c/b
		SVM	0.794173	a	0.89941	b	0.850371	bc	c/a/b	0.0230166	c	0.0144309	a	0.0179572	bc	a/c/b
		RF	0.782248	ab	0.918173	a	0.91062	a	b/a/a	0.0258906	b	0.0113258	c	0.0124613	d	a/c/b
		AB	0.770675	b	0.925251	a	0.899642	a	c/a/b	0.0258276	b	0.00960572	d	0.0139169	d	a/c/b
		MLP	0.693033	c	0.871765	c	0.75221	d	c/a/b	0.0339825	a	0.0146598	a	0.040334	a	a/c/b
	5	RKHS	0.705533	a	0.875355	a	0.825831	b	c/a/b	0.0255952	c	0.0127939	c	0.0158801	c	a/c/b
		BRR	0.678581	b	0.858678	c	0.787201	c	c/a/b	0.0271369	b	0.0136533	b	0.0198023	b	a/c/b
		SVM	0.696953	ab	0.858893	bc	0.826981	b	c/a/b	0.0264115	bc	0.0154194	a	0.0157657	c	a/c/b
		RF	0.691308	ab	0.869776	ab	0.868696	a	b/a/a	0.0261904	bc	0.0130304	bc	0.0127369	d	a/b/b
		AB	0.677212	b	0.876042	a	0.870381	a	b/a/a	0.0267475	b	0.0120778	d	0.0123412	d	a/b/b
		MLP	0.578355	c	0.835226	d	0.657428	d	c/a/b	0.0359587	a	0.0152612	a	0.0397565	a	a/b/b
	6	RKHS	0.695699	a	0.834275	c	0.832691	b	b/a/a	0.0388722	cd	0.023187	c	0.0236515	b	a/b/b
		BRR	0.698829	a	0.832165	c	0.831207	b	b/a/a	0.0381457	d	0.0239299	bc	0.023342	b	a/b/b
		SVM	0.698677	a	0.822339	c	0.825092	bc	b/a/a	0.0373536	d	0.0244514	b	0.024438	b	a/b/b
		RF	0.680155	a	0.861689	b	0.883769	a	c/b/a	0.0401816	c	0.0194944	d	0.0160663	c	a/b/c
		AB	0.647383	b	0.888741	a	0.889017	a	b/a/a	0.0453398	b	0.015753	e	0.0149892	c	a/b/b
		MLP	0.592404	c	0.788444	d	0.811538	c	c/b/a	0.0514699	a	0.0289212	a	0.0279106	a	a/b/b
	7	RKHS	0.752516	a	0.889002	ab	0.862317	b	c/a/b	0.0232696	d	0.0124667	b	0.0146569	c	a/c/b
		BRR	0.752835	a	0.888434	ab	0.848012	b	c/a/b	0.0224578	d	0.0109703	d	0.0157619	b	a/c/b
		SVM	0.749566	a	0.875509	b	0.856928	b	c/a/b	0.0234511	cd	0.0144961	a	0.0149001	c	a/c/b
		RF	0.740661	a	0.893053	a	0.896412	a	b/a/a	0.0248296	b	0.0116467	c	0.0105486	d	a/b/c
		AB	0.744794	a	0.896055	a	0.905033	a	b/a/a	0.0244647	bc	0.0105636	d	0.00988483	d	a/b/c
		MLP	0.644805	b	0.852316	c	0.782638	c	c/a/b	0.0334232	a	0.01432	a	0.0235692	a	a/b/c
	8	RKHS	0.672993	ab	0.833632	c	0.859608	bc	c/b/a	0.0275438	b	0.0161547	c	0.013845	cd	a/b/c
		BRR	0.683097	ab	0.833885	c	0.821006	d	c/a/b	0.0275438	b	0.0156185	c	0.016528	b	a/c/b
		SVM	0.672093	b	0.817309	d	0.847037	c	c/b/a	0.026934	b	0.0176116	b	0.0150007	c	a/c/b
		RF	0.695679	a	0.858452	b	0.871635	ab	c/b/a	0.0256779	c	0.0139397	d	0.0126358	de	a/b/c
		AB	0.666399	b	0.878884	a	0.881623	a	b/a/a	0.0272504	b	0.0120686	e	0.0117093	e	a/b/b
		MLP	0.53324	c	0.787632	e	0.734559	e	c/a/b	0.0394151	a	0.0192179	a	0.0318344	a	a/b/b
	9	RKHS	0.654491	a	0.81089	c	0.812778	b	b/a/a	0.0275402	e	0.0176471	c	0.0166695	d	a/b/c
		BRR	0.628134	b	0.822749	bc	0.764127	d	c/a/b	0.0297552	c	0.0160567	de	0.020509	b	a/c/b
		SVM	0.649271	ab	0.79029	d	0.784792	c	b/a/a	0.0285296	de	0.0202596	a	0.0191086	c	a/c/b
		RF	0.630953	ab	0.829625	ab	0.842615	a	b/a/a	0.0292887	cd	0.0164192	d	0.0142442	e	a/b/c
		AB	0.576525	c	0.837727	a	0.838618	a	b/a/a	0.0327397	b	0.0153906	e	0.014641	e	a/b/b
		MLP	0.533931	d	0.78667	d	0.731597	e	c/a/b	0.0386364	a	0.0190556	b	0.0323792	a	a/b/b
	Total Sum	RKHS	0.788829	a	0.887448	b	0.885608	b	b/a/a	0.0224973	d	0.0136292	c	0.013245	d	a/b/b
		BRR	0.768839	ab	0.873415	c	0.857259	d	c/a/b	0.0244264	c	0.0141397	c	0.01651	b	a/c/b
		SVM	0.786316	a	0.877928	bc	0.869339	c	b/a/a	0.022895	d	0.0153547	b	0.0154986	c	a/c/b
		RF	0.77242	ab	0.927172	a	0.931958	a	b/a/a	0.0246803	c	0.00992103	d	0.00848877	e	a/b/c
		AB	0.752363	b	0.935406	a	0.939335	a	b/a/a	0.0259849	b	0.00821593	e	0.00738481	f	a/b/c
		MLP	0.676619	c	0.851288	d	0.854735	d	b/a/a	0.0344028	a	0.0160516	a	0.0182318	a	a/b/c
Trait	Clipping	Model	Complete Dataset		FI-1		FI-2		Comparison of Tukey's Test (Predictive Ability)	Complete Dataset		FI-1		FI-2		Comparison of Tukey's Test (Mean Squared Error)
			Predictive Ability	Tukey's Test	Predictive Ability	Tukey's Test	Predictive Ability	Tukey's Test		Mean Squared Error	Tukey's Test	Mean Squared Error	Tukey's Test	Mean Squared Error	Tukey's Test
Leaf Dry Matter	2	RKHS	0.71736	a	0.863686	a	0.835311	b	c/a/b	0.0271288	d	0.0159748	d	0.0191104	c	a/c/b
		BRR	0.693589	ab	0.870258	a	0.742827	c	c/a/b	0.0285955	c	0.0145577	e	0.0286721	b	a/b/a
		SVM	0.717405	a	0.838028	b	0.822558	b	b/a/a	0.0274844	cd	0.0187213	a	0.0205598	c	a/b/a
		RF	0.669756	bc	0.863385	a	0.875051	a	b/a/a	0.0324984	b	0.0167663	c	0.0142354	d	a/b/c
		AB	0.648508	c	0.876299	a	0.878549	a	b/a/a	0.0330361	b	0.0143637	e	0.0139191	d	a/b/b
		MLP	0.600333	d	0.838885	b	0.749587	c	c/a/b	0.0393541	a	0.0177262	b	0.0403611	a	a/b/b
	5	RKHS	0.863388	a	0.896351	b	0.897175	b	b/a/a	0.0150681	d	0.012861	d	0.0123813	d	a/b/c
		BRR	0.843877	b	0.865726	c	0.83978	d	b/a/b	0.0162997	c	0.0148122	c	0.0169988	b	b/c/a
		SVM	0.848777	ab	0.900439	b	0.881862	c	c/a/b	0.018467	b	0.0159373	b	0.0148273	c	b/c/a
		RF	0.858387	ab	0.937469	a	0.923994	a	c/a/b	0.0160531	c	0.00922967	e	0.0113474	d	a/c/b
		AB	0.846369	ab	0.931188	a	0.90897	b	c/a/b	0.0158861	cd	0.00992733	e	0.0153545	c	a/b/a
		MLP	0.748701	c	0.777142	d	0.823077	e	c/b/a	0.0256493	a	0.0230118	a	0.0223781	a	a/b/a
	Total Sum	RKHS	0.817774	a	0.894547	b	0.900442	c	b/a/a	0.0198483	c	0.0126372	d	0.0114611	c	a/b/c
		BRR	0.805373	a	0.873528	c	0.841926	e	c/a/b	0.020797	bc	0.0143863	c	0.0175188	a	a/c/b
		SVM	0.812617	a	0.873528	c	0.860906	d	b/a/a	0.0215374	b	0.0154764	b	0.0163384	b	a/c/b
		RF	0.811799	a	0.916628	a	0.952476	a	c/b/a	0.0204045	c	0.0105788	e	0.00671454	e	a/b/c
		AB	0.804239	a	0.91573	a	0.929011	b	c/b/a	0.0206486	bc	0.00995318	e	0.00822075	d	a/b/c
		MLP	0.695387	b	0.838645	d	0.848051	de	b/a/a	0.0322535	a	0.0177921	a	0.0181562	a	a/b/c
Trait	Clipping	Model	Complete Dataset		FI-1		FI-2		Comparison of Tukey's Test (Predictive Ability)	Complete Dataset		FI-1		FI-2		Comparison of Tukey's Test (Mean Squared Error)
			Predictive Ability	Tukey's Test	Predictive Ability	Tukey's Test	Predictive Ability	Tukey's Test		Mean Squared Error	Tukey's Test	Mean Squared Error	Tukey's Test	Mean Squared Error	Tukey's Test
Stem Dry Matter	2	RKHS	0.489589	a	0.813641	a	0.663659	b	c/a/b	0.0453278	c	0.0233202	b	0.0334413	c	a/c/b
		BRR	0.477021	a	0.794603	b	0.651695	b	c/a/b	0.0462702	c	0.022894	b	0.0364101	b	a/c/b
		SVM	0.49112	a	0.793587	b	0.642595	b	c/a/b	0.0448285	c	0.0248272	a	0.0355514	bc	a/c/b
		RF	0.472491	a	0.773149	cd	0.817804	a	c/b/a	0.0464359	c	0.0259627	a	0.0208902	d	a/b/c
		AB	0.428553	b	0.760105	d	0.794829	a	c/b/a	0.0496881	b	0.0259113	a	0.02228	d	a/b/c
		MLP	0.385637	c	0.782227	bc	0.535795	c	c/a/b	0.057911	a	0.0231455	b	0.0617376	a	a/b/c
	5	RKHS	0.809412	a	0.920062	ab	0.903558	b	c/a/b	0.0198454	c	0.0131312	c	0.0109631	c	a/b/c
		BRR	0.771776	b	0.880505	c	0.84818	d	c/a/b	0.0214123	b	0.0147218	b	0.0156028	a	a/c/b
		SVM	0.797992	ab	0.909037	b	0.911512	ab	b/a/a	0.0221787	b	0.0167454	a	0.0129347	b	a/c/b
		RF	0.79148	ab	0.922377	a	0.920505	a	b/a/a	0.0212103	b	0.0124318	c	0.0121008	b	a/b/b
		AB	0.777832	b	0.910244	b	0.908473	ab	b/a/a	0.0220523	b	0.0150084	b	0.0153956	a	a/b/b
		MLP	0.688272	c	0.854103	d	0.863933	c	b/a/a	0.0300787	a	0.0171015	a	0.0155618	a	a/b/b
	Total Sum	RKHS	0.497588	ab	0.716384	b	0.693554	b	c/a/b	0.0362265	b	0.0245373	bc	0.0248209	d	a/b/b
		BRR	0.490818	ab	0.712026	b	0.611901	d	c/a/b	0.0365192	b	0.0239733	c	0.0302363	b	a/c/b
		SVM	0.492472	ab	0.706521	b	0.667054	c	c/a/b	0.0363972	b	0.0255476	b	0.0267974	c	a/c/b
		RF	0.506922	a	0.773215	a	0.834793	a	c/b/a	0.0350925	b	0.0195568	d	0.0154471	e	a/b/c
		AB	0.473203	b	0.772382	a	0.83682	a	c/b/a	0.0368057	b	0.019142	d	0.0151014	e	a/b/c
		MLP	0.341332	c	0.641538	c	0.667078	c	b/a/a	0.0488037	a	0.0298771	a	0.0324523	a	a/b/c

## Sheet: Table S3
Supplementary Table S3. Comparison of model performances assessed by predictive ability and mean squared error, separated according to phenotype and clipping. For each specific combination of trait, clipping, and dataset configuration, a distinct Tukey's test was conducted to compare clippings. The compared datasets encompassed the following: (i) the complete dataset, (ii) markers selected by at …
Model	Trait	Clipping	Complete Dataset		FI-1		FI-2		Comparison of Tukey's Test (Predictive Ability)	Complete Dataset		FI-1		FI-2		Comparison of Tukey's Test (Mean Squared Error)
			Predictive Ability	Tukey's Test	Predictive Ability	Tukey's Test	Predictive Ability	Tukey's Test		Mean Squared Error	Tukey's Test	Mean Squared Error	Tukey's Test	Mean Squared Error	Tukey's Test
RKHS	Green Matter	2	0.653172	f	0.83703	e	0.857405	de	b/a/a	0.0291985	b	0.0172603	b	0.0178439	bc	a/c/b
		3	0.743454	e	0.847639	e	0.869805	cd	c/b/a	0.0303575	a	0.0209439	a	0.0164412	d	a/b/c
		4	0.847489	ab	0.905917	b	0.894197	ab	c/a/b	0.0201094	e	0.0139409	d	0.0145865	e	a/c/b
		5	0.84337	ab	0.908798	b	0.866353	d	c/a/b	0.0178701	f	0.012449	e	0.0159826	d	a/c/b
		6	0.826054	bc	0.884859	cd	0.862953	d	c/a/b	0.0204588	e	0.0152581	c	0.0184724	bc	a/c/b
		7	0.795065	d	0.889173	c	0.84405	e	c/a/b	0.0228898	d	0.0143562	d	0.0186401	b	a/c/b
		8	0.85777	a	0.92705	a	0.880799	bc	c/a/b	0.0247353	c	0.0140651	d	0.0203672	a	a/c/b
		9	0.799296	d	0.877049	d	0.897492	a	c/b/a	0.0230963	d	0.015562	c	0.0121958	f	a/b/c
		Total Sum	0.807318	cd	0.878994	cd	0.86722	cd	b/a/a	0.0249697	c	0.0171722	b	0.0177513	c	a/c/b
	Dry Matter	2	0.601463	e	0.851097	e	0.53723	f	b/a/c	0.032801	a	0.0175558	a	0.0438823	a	b/c/a
		3	0.754469	d	0.850772	e	0.80186	e	c/a/b	0.0147324	f	0.0114914	e	0.0135934	ef	a/c/b
		4	0.868606	a	0.930335	a	0.934781	a	b/a/a	0.0185825	d	0.0116293	e	0.0101573	g	a/b/c
		5	0.841272	b	0.913228	b	0.881676	c	c/a/b	0.01727	e	0.0113701	e	0.014318	e	a/c/b
		6	0.828869	b	0.899737	c	0.883823	c	c/a/b	0.0213348	c	0.0139633	c	0.0158005	d	a/c/b
		7	0.793754	c	0.875436	d	0.848646	d	c/a/b	0.0212379	c	0.0149837	b	0.0174229	c	a/c/b
		8	0.875176	a	0.936539	a	0.910802	b	c/a/b	0.0207949	c	0.0117074	e	0.016363	d	a/c/b
		9	0.791862	c	0.885396	d	0.786686	e	b/a/b	0.0228987	b	0.0145853	b	0.0220109	b	a/c/b
		Total Sum	0.835306	b	0.916407	b	0.911897	b	b/a/a	0.0210838	c	0.0126121	d	0.0127867	f	a/b/b
	Regrowth	2	0.638775	f	0.851321	e	0.867736	c	c/b/a	0.0368251	b	0.0187324	b	0.0151588	cd	a/b/c
		3	0.873407	a	0.94607	a	0.939552	a	c/a/b	0.0233386	e	0.0110483	g	0.0112311	f	a/b/b
		4	0.796087	b	0.906898	b	0.859337	c	c/a/b	0.0230475	ef	0.0124626	f	0.016871	b	a/c/b
		5	0.705533	d	0.875355	d	0.825831	de	c/a/b	0.0255952	d	0.0127939	f	0.0158801	c	a/c/b
		6	0.695699	d	0.834275	f	0.832691	d	b/a/a	0.0388722	a	0.0239299	a	0.0236515	a	a/b/b
		7	0.752516	c	0.889002	c	0.862317	c	c/a/b	0.0232696	e	0.0124667	f	0.0146569	d	a/c/b
		8	0.672993	e	0.833632	f	0.859608	c	c/b/a	0.0275438	c	0.0161547	d	0.013845	e	a/b/c
		9	0.654491	ef	0.81089	g	0.812778	e	b/a/a	0.0275402	c	0.0176471	c	0.0166695	b	a/b/c
		Total Sum	0.788829	b	0.887448	c	0.885608	b	b/a/a	0.0224973	f	0.0136292	e	0.013245	e	a/b/b
	Leaf Dry Matter	2	0.71736	c	0.863686	b	0.835311	b	c/a/b	0.0271288	a	0.0159748	a	0.0191104	a	a/c/b
		5	0.863388	a	0.896351	a	0.897175	a	b/a/a	0.0150681	c	0.012861	b	0.0123813	b	a/b/c
		Total Sum	0.817774	b	0.894547	a	0.900442	a	b/a/a	0.0198483	b	0.0126372	b	0.0114611	c	a/b/c
	Stem Dry Matter	2	0.489589	b	0.813641	b	0.663659	c	c/a/b	0.0453278	a	0.0245373	a	0.0334413	a	a/c/b
		5	0.809412	a	0.920062	a	0.903558	a	c/a/b	0.0198454	c	0.0233202	b	0.0109631	c	a/b/c
		Total Sum	0.497588	b	0.716384	c	0.693554	b	c/a/b	0.0362265	b	0.0131312	c	0.0248209	b	a/b/b
Model	Trait	Clipping	Complete Dataset		FI-1		FI-2		Comparison of Tukey's Test (Predictive Ability)	Complete Dataset		FI-1		FI-2		Comparison of Tukey's Test (Mean Squared Error)
			Predictive Ability	Tukey's Test	Predictive Ability	Tukey's Test	Predictive Ability	Tukey's Test		Mean Squared Error	Tukey's Test	Mean Squared Error	Tukey's Test	Mean Squared Error	Tukey's Test
BRR	Green Matter	2	0.624703	d	0.822343	f	0.836692	c	b/a/a	0.0304205	b	0.0181619	c	0.0176573	e	a/b/c
		3	0.713864	c	0.81202	f	0.788377	e	c/a/b	0.033149	a	0.0232775	a	0.0265082	b	a/c/b
		4	0.827782	a	0.874068	bc	0.855139	ab	c/a/b	0.0219449	f	0.0145512	g	0.0195807	d	a/c/b
		5	0.823318	a	0.87698	b	0.853865	ab	c/a/b	0.0190641	g	0.016528	ef	0.0191638	d	a/b/a
		6	0.797616	b	0.857701	d	0.844911	bc	c/a/b	0.0229865	e	0.017388	d	0.018814	d	a/c/b
		7	0.782649	b	0.853377	de	0.808756	d	c/a/b	0.0238493	d	0.0171141	de	0.0218231	c	a/c/b
		8	0.840219	a	0.902465	a	0.818097	d	b/a/c	0.0265293	c	0.0169244	de	0.0301169	a	b/c/a
		9	0.791731	b	0.862245	cd	0.865727	a	b/a/a	0.0236417	d	0.0163148	f	0.0164597	f	a/b/b
		Total Sum	0.792528	b	0.840495	e	0.852199	ab	c/b/a	0.0263184	c	0.0207496	b	0.0193457	d	a/b/c
	Dry Matter	2	0.58032	e	0.866327	c	0.606487	g	c/a/b	0.0338581	a	0.0150264	d	0.0385227	a	b/c/a
		3	0.732146	d	0.80098	e	0.799232	e	b/a/a	0.0154461	h	0.0137935	f	0.0136392	f	a/b/b
		4	0.845252	a	0.898495	a	0.892231	ab	b/a/a	0.0208973	f	0.0144727	e	0.015843	d	a/c/b
		5	0.816079	b	0.881253	b	0.877886	b	b/a/a	0.0188796	g	0.0135441	f	0.0146833	e	a/c/b
		6	0.811906	b	0.88145	b	0.855521	c	c/a/b	0.0229548	cd	0.0156802	bc	0.0186966	c	a/c/b
		7	0.781827	c	0.821253	d	0.838076	d	c/b/a	0.0221483	e	0.0189751	a	0.0179834	c	a/b/c
		8	0.855145	a	0.907623	a	0.9075	a	b/a/a	0.0231438	bc	0.0152485	cd	0.0162575	d	a/c/b
		9	0.781851	c	0.860761	c	0.752084	f	b/a/c	0.0236254	b	0.0160734	b	0.0269696	b	b/c/a
		Total Sum	0.820469	b	0.884915	b	0.894562	a	b/a/a	0.0224529	de	0.0157095	bc	0.0145344	e	a/b/c
	Regrowth	2	0.593918	f	0.843209	e	0.820764	e	c/a/b	0.0402481	a	0.018063	b	0.0212025	b	a/c/b
		3	0.878167	a	0.932432	a	0.904973	a	c/a/b	0.0216078	g	0.0127806	e	0.017374	e	a/c/b
		4	0.800236	b	0.898652	b	0.842287	cd	c/a/b	0.0219163	fg	0.0114843	f	0.0190831	d	a/c/b
		5	0.678581	d	0.858678	d	0.787201	f	c/a/b	0.0271369	d	0.0136533	d	0.0198023	cd	a/c/b
		6	0.698829	d	0.832165	ef	0.831207	de	b/a/a	0.0381457	b	0.023187	a	0.023342	a	a/b/b
		7	0.752835	c	0.888434	b	0.848012	bc	c/a/b	0.0224578	f	0.0109703	f	0.0157619	g	a/c/b
		8	0.683097	d	0.833885	ef	0.821006	e	c/a/b	0.026934	d	0.0156185	c	0.016528	f	a/c/b
		9	0.628134	e	0.822749	f	0.764127	g	c/a/b	0.0297552	c	0.0160567	c	0.020509	bc	a/c/b
		Total Sum	0.768839	c	0.873415	c	0.857259	b	c/a/b	0.0244264	e	0.0141397	d	0.01651	fg	a/c/b
	Leaf Dry Matter	2	0.693589	c	0.870258	a	0.742827	b	c/a/b	0.0285955	a	0.0145577	ab	0.0286721	a	a/b/a
		5	0.843877	a	0.865726	a	0.83978	a	b/a/b	0.0162997	c	0.0148122	a	0.0169988	b	b/c/a
		Total Sum	0.805373	b	0.873528	a	0.841926	a	c/a/b	0.020797	b	0.0143863	b	0.0175188	b	a/c/b
	Stem Dry Matter	2	0.477021	b	0.794603	b	0.651695	b	c/a/b	0.0462702	a	0.022894	b	0.0364101	a	a/c/b
		5	0.771776	a	0.880505	a	0.84818	a	c/a/b	0.0214123	c	0.0147218	c	0.0156028	c	a/c/b
		Total Sum	0.490818	b	0.712026	c	0.611901	c	c/a/b	0.0365192	b	0.0239733	a	0.0302363	b	a/c/b
Model	Trait	Clipping	Complete Dataset		FI-1		FI-2		Comparison of Tukey's Test (Predictive Ability)	Complete Dataset		FI-1		FI-2		Comparison of Tukey's Test (Mean Squared Error)
			Predictive Ability	Tukey's Test	Predictive Ability	Tukey's Test	Predictive Ability	Tukey's Test		Mean Squared Error	Tukey's Test	Mean Squared Error	Tukey's Test	Mean Squared Error	Tukey's Test
SVM	Green Matter	2	0.667529	f	0.84028	d	0.829213	de	b/a/a	0.0286036	b	0.0186942	c	0.022254	a	a/b/c
		3	0.748727	e	0.83546	d	0.849798	c	c/b/a	0.0301418	a	0.0216236	a	0.0192001	c	a/c/b
		4	0.839048	ab	0.900585	b	0.895223	a	b/a/a	0.0219171	e	0.0168133	e	0.0148833	e	a/c/b
		5	0.832937	b	0.901974	b	0.842906	cd	b/a/b	0.0201734	f	0.0148994	f	0.0181573	d	a/b/a
		6	0.824312	bc	0.877916	c	0.842849	cd	c/a/b	0.0216855	e	0.0174765	d	0.0215909	ab	a/c/b
		7	0.792746	d	0.87858	c	0.821677	e	c/a/b	0.0243458	d	0.0169016	e	0.0213792	ab	a/c/b
		8	0.856503	a	0.920568	a	0.872621	b	c/a/b	0.0259586	c	0.0167275	e	0.0207593	b	b/c/a
		9	0.798528	d	0.868196	c	0.888007	ab	c/b/a	0.0244979	d	0.0175087	d	0.0140775	e	a/b/b
		Total Sum	0.805749	cd	0.87236	c	0.842977	cd	c/a/b	0.0259131	c	0.0193374	b	0.0212223	b	a/b/c
	Dry Matter	2	0.604046	e	0.84272	e	0.447465	g	b/a/c	0.0328523	a	0.0199477	a	0.0491028	a	b/c/a
		3	0.750331	d	0.813522	f	0.808421	e	b/a/a	0.0174619	g	0.0158127	d	0.0145146	f	a/b/b
		4	0.864534	a	0.915423	ab	0.927077	a	c/b/a	0.0198131	e	0.0140573	e	0.0113758	g	a/c/b
		5	0.830585	b	0.905491	bc	0.84715	d	c/a/b	0.0191888	f	0.0126299	f	0.0181516	d	a/c/b
		6	0.828359	b	0.897071	c	0.871116	c	c/a/b	0.022565	cd	0.0154492	d	0.0186778	cd	a/c/b
		7	0.79477	c	0.864344	d	0.854015	cd	b/a/a	0.0219987	d	0.016974	c	0.0165166	e	a/b/c
		8	0.871107	a	0.927454	a	0.897048	b	c/a/b	0.0221289	cd	0.014413	e	0.0198032	c	a/c/b
		9	0.788146	c	0.874557	d	0.776171	f	b/a/b	0.0249185	b	0.0181067	b	0.0227035	b	b/c/a
		Total Sum	0.833008	b	0.904366	bc	0.896216	b	b/a/a	0.0226418	c	0.0154885	d	0.016081	e	a/b/c
	Regrowth	2	0.647884	f	0.843349	e	0.828233	d	b/a/a	0.035952	b	0.0211869	b	0.0209427	b	a/c/b
		3	0.870163	a	0.930136	a	0.933707	a	b/a/a	0.0249467	e	0.0155384	e	0.0153657	ef	a/c/b
		4	0.794173	b	0.89941	b	0.850371	c	c/a/b	0.0230166	f	0.0144309	f	0.0179572	d	a/c/b
		5	0.696953	d	0.858893	d	0.826981	d	c/a/b	0.0264115	d	0.0154194	e	0.0157657	e	a/c/b
		6	0.698677	d	0.822339	f	0.825092	d	b/a/a	0.0373536	a	0.0244514	a	0.024438	a	a/b/b
		7	0.749566	c	0.875509	c	0.856928	bc	c/a/b	0.0234511	f	0.0144961	f	0.0149001	f	a/c/b
		8	0.672093	e	0.817309	f	0.847037	c	c/b/a	0.0279628	c	0.0176116	d	0.0150007	ef	a/c/b
		9	0.649271	f	0.79029	g	0.784792	e	b/a/a	0.0285296	c	0.0202596	c	0.0191086	c	a/c/b
		Total Sum	0.786316	b	0.877928	c	0.869339	b	b/a/a	0.022895	f	0.0153547	e	0.0154986	ef	a/c/b
	Leaf Dry Matter	2	0.717405	c	0.838028	c	0.822558	c	b/a/a	0.0274844	a	0.0187213	a	0.0205598	a	a/b/a
		5	0.848777	a	0.900439	a	0.881862	a	c/a/b	0.018467	c	0.0159373	b	0.0148273	c	b/c/a
		Total Sum	0.812617	b	0.873321	b	0.860906	b	b/a/a	0.0215374	b	0.0154764	b	0.0163384	b	a/c/b
	Stem Dry Matter	2	0.49112	b	0.793587	b	0.642595	c	c/a/b	0.0448285	a	0.0248272	a	0.0355514	a	a/c/b
		5	0.797992	a	0.909037	a	0.911512	a	b/a/a	0.0221787	c	0.0167454	b	0.0129347	c	a/c/b
		Total Sum	0.492472	b	0.706521	c	0.667054	b	c/a/b	0.0363972	b	0.0255476	a	0.0267974	b	a/c/b
Model	Trait	Clipping	Complete Dataset		FI-1		FI-2		Comparison of Tukey's Test (Predictive Ability)	Complete Dataset		FI-1		FI-2		Comparison of Tukey's Test (Mean Squared Error)
			Predictive Ability	Tukey's Test	Predictive Ability	Tukey's Test	Predictive Ability	Tukey's Test		Mean Squared Error	Tukey's Test	Mean Squared Error	Tukey's Test	Mean Squared Error	Tukey's Test
RF	Green Matter	2	0.606385	e	0.840538	d	0.849613	e	b/a/a	0.0326981	b	0.0194552	a	0.0182074	a	a/b/c
		3	0.694576	d	0.858491	c	0.868801	d	b/a/a	0.0362847	a	0.0190736	a	0.0168911	b	a/b/c
		4	0.829434	ab	0.923444	ab	0.911772	bc	c/a/b	0.0228405	d	0.0108562	d	0.0130488	d	a/c/b
		5	0.839147	ab	0.931499	a	0.91746	b	c/a/b	0.0185409	f	0.00986794	e	0.0118885	e	a/c/b
		6	0.81608	bc	0.92595	ab	0.902553	c	c/a/b	0.0217712	e	0.00993839	e	0.0118308	e	a/c/b
		7	0.794848	c	0.920512	b	0.922844	b	b/a/a	0.023277	d	0.0107654	d	0.0103574	f	a/b/b
		8	0.848429	a	0.93199	a	0.912903	bc	c/a/b	0.0273411	c	0.012654	b	0.0151523	c	a/c/b
		9	0.801609	c	0.919859	b	0.944029	a	c/b/a	0.0226096	d	0.0110621	d	0.00778391	h	a/b/c
		Total Sum	0.794961	c	0.918701	b	0.937331	a	c/b/a	0.0268845	c	0.0117861	c	0.00923037	g	a/b/c
	Dry Matter	2	0.547305	f	0.794534	e	0.638167	e	c/a/b	0.0372933	a	0.0229232	a	0.0346354	a	a/c/b
		3	0.730905	e	0.855592	d	0.84014	d	c/a/b	0.0161344	f	0.0119055	b	0.0134357	d	a/c/b
		4	0.847424	ab	0.931563	b	0.941429	a	c/b/a	0.0229215	c	0.010347	d	0.00899879	f	a/b/c
		5	0.836437	abc	0.933457	b	0.895157	c	c/a/b	0.0183578	e	0.00889233	e	0.0145825	c	a/c/b
		6	0.819103	c	0.927978	b	0.917158	b	b/a/a	0.0226282	c	0.0102576	d	0.0106127	e	a/b/b
		7	0.78851	d	0.91549	c	0.912599	b	b/a/a	0.0219069	d	0.0110497	c	0.0112721	e	a/b/b
		8	0.859679	a	0.950206	a	0.915231	b	c/a/b	0.024805	b	0.00900828	e	0.0164935	b	a/c/b
		9	0.791457	d	0.912795	c	0.925005	b	c/b/a	0.0226517	c	0.012154	b	0.0107651	e	a/b/c
		Total Sum	0.829608	bc	0.934062	b	0.943396	a	b/a/a	0.022464	cd	0.00990208	d	0.00854116	f	a/b/c
	Regrowth	2	0.590951	f	0.857399	e	0.896266	d	c/b/a	0.0409677	a	0.0195453	a	0.0139974	b	a/b/c
		3	0.861456	a	0.946168	a	0.956415	a	c/b/a	0.0261776	c	0.0101979	f	0.00810197	e	a/b/c
		4	0.782248	b	0.918173	b	0.91062	c	b/a/a	0.0258906	c	0.0113258	e	0.0124613	c	a/c/b
		5	0.691308	d	0.869776	d	0.868696	f	b/a/a	0.0261904	c	0.0130304	d	0.0127369	c	a/b/b
		6	0.680155	d	0.861689	de	0.883769	e	c/b/a	0.0401816	a	0.0194944	a	0.0160663	a	a/b/c
		7	0.740661	c	0.893053	c	0.896412	d	b/a/a	0.0248296	d	0.0116467	e	0.0105486	d	a/b/c
		8	0.695679	d	0.858452	de	0.871635	f	c/b/a	0.0256779	c	0.0139397	c	0.0126358	c	a/b/c
		9	0.630953	e	0.829625	f	0.842615	g	b/a/a	0.0292887	b	0.0164192	b	0.0142442	b	a/b/c
		Total Sum	0.77242	b	0.927172	b	0.931958	b	b/a/a	0.0246803	d	0.00992103	f	0.00848877	e	a/b/c
	Leaf Dry Matter	2	0.669756	c	0.863385	c	0.875051	c	b/a/a	0.0324984	a	0.0167663	a	0.0142354	a	a/b/c
		5	0.858387	a	0.937469	a	0.923994	b	c/a/b	0.0160531	c	0.00922967	c	0.0113474	b	a/c/b
		Total Sum	0.811799	b	0.916628	b	0.952476	a	c/b/a	0.0204045	b	0.0105788	b	0.00671454	c	a/b/c
	Stem Dry Matter	2	0.472491	c	0.773149	b	0.817804	c	c/b/a	0.0464359	a	0.0259627	a	0.0208902	a	a/b/c
		5	0.79148	a	0.922377	a	0.920505	a	b/a/a	0.0212103	c	0.0124318	c	0.0121008	c	a/b/b
		Total Sum	0.506922	b	0.773215	b	0.834793	b	c/b/a	0.0350925	b	0.0195568	b	0.0154471	b	a/b/c
Model	Trait	Clipping	Complete Dataset		FI-1		FI-2		Comparison of Tukey's Test (Predictive Ability)	Complete Dataset		FI-1		FI-2		Comparison of Tukey's Test (Mean Squared Error)
			Predictive Ability	Tukey's Test	Predictive Ability	Tukey's Test	Predictive Ability	Tukey's Test		Mean Squared Error	Tukey's Test	Mean Squared Error	Tukey's Test	Mean Squared Error	Tukey's Test
AB	Green Matter	2	0.551474	f	0.805472	e	0.843508	f	c/b/a	0.0363229	b	0.0203914	a	0.0170221	a	a/b/c
		3	0.655646	e	0.864686	d	0.877255	e	b/a/a	0.0391036	a	0.0176322	b	0.0163347	a	a/b/c
		4	0.819206	abc	0.930345	a	0.901628	cd	c/a/b	0.0230537	ef	0.00986796	f	0.0143328	bc	a/c/b
		5	0.826608	ab	0.926947	ab	0.891517	de	c/a/b	0.0188701	g	0.0105631	ef	0.0149965	b	a/c/b
		6	0.807398	bcd	0.921778	abc	0.888484	de	c/a/b	0.0222719	f	0.00964999	f	0.013215	cd	a/c/b
		7	0.792622	d	0.91108	c	0.909359	bc	b/a/a	0.0223893	f	0.010938	de	0.0120886	de	a/c/b
		8	0.8389	a	0.931719	a	0.917474	ab	c/a/b	0.0279119	c	0.0124183	c	0.0141419	bc	a/c/b
		9	0.790335	d	0.91234	c	0.930806	a	c/b/a	0.0239822	e	0.0109656	de	0.00905164	f	a/b/c
		Total Sum	0.795651	cd	0.91483	bc	0.919765	ab	b/a/a	0.0255977	d	0.011765	cd	0.0115043	e	a/b/b
	Dry Matter	2	0.518281	f	0.788925	f	0.697851	g	c/a/b	0.0389441	a	0.0215582	a	0.0294065	a	a/c/b
		3	0.715234	e	0.863408	e	0.807912	f	c/a/b	0.0152667	g	0.0107482	c	0.0189752	c	b/c/a
		4	0.833105	b	0.931754	bc	0.934712	a	b/a/a	0.0228301	bc	0.00989873	d	0.00932284	e	a/b/b
		5	0.826402	b	0.934071	ab	0.867996	e	c/a/b	0.0183764	f	0.00896692	e	0.0199728	bc	b/c/a
		6	0.813086	bc	0.92524	bc	0.916266	bc	b/a/a	0.0223812	cd	0.010122	cd	0.010916	de	a/c/b
		7	0.788466	cd	0.919924	c	0.899554	cd	c/a/b	0.021567	de	0.0100087	cd	0.0123326	d	a/c/b
		8	0.865143	a	0.946369	a	0.894828	d	c/a/b	0.0226468	bc	0.00881096	e	0.020745	b	a/c/b
		9	0.782254	d	0.896286	d	0.934556	a	c/b/a	0.0236213	b	0.0129827	b	0.00940584	e	a/b/c
		Total Sum	0.824825	b	0.933531	ab	0.931344	ab	b/a/a	0.0212935	e	0.00940213	de	0.010271	e	a/c/b
	Regrowth	2	0.555983	f	0.884958	cde	0.896288	cd	b/a/a	0.0433574	b	0.0146724	b	0.0125722	c	a/b/c
		3	0.845481	a	0.950318	a	0.957391	a	b/a/a	0.0263358	de	0.00898084	ef	0.00791615	e	a/b/c
		4	0.770675	b	0.925251	b	0.899642	cd	c/a/b	0.0258276	e	0.00960572	e	0.0139169	b	a/c/b
		5	0.677212	d	0.876042	e	0.870381	f	b/a/a	0.0267475	de	0.0120778	c	0.0123412	c	a/b/b
		6	0.647383	e	0.888741	cd	0.889017	de	b/a/a	0.0453398	a	0.015753	a	0.0149892	a	a/b/b
		7	0.744794	c	0.896055	c	0.905033	c	b/a/a	0.0244647	f	0.0105636	d	0.00988483	d	a/b/c
		8	0.666399	de	0.878884	de	0.881623	ef	b/a/a	0.0272504	d	0.0120686	c	0.0117093	c	a/b/b
		9	0.576525	f	0.837727	f	0.838618	g	b/a/a	0.0327397	c	0.0153906	ab	0.014641	ab	a/b/b
		Total Sum	0.752363	bc	0.935406	b	0.939335	b	b/a/a	0.0259849	de	0.00821593	f	0.00738481	e	a/b/c
	Leaf Dry Matter	2	0.648508	c	0.876299	c	0.878549	c	b/a/a	0.0330361	a	0.0143637	a	0.0139191	b	a/b/b
		5	0.846369	a	0.931188	a	0.90897	b	c/a/b	0.0158861	c	0.00992733	b	0.0153545	a	a/b/a
		Total Sum	0.804239	b	0.91573	b	0.929011	a	c/b/a	0.0206486	b	0.00995318	b	0.00822075	c	a/b/c
	Stem Dry Matter	2	0.428553	c	0.760105	b	0.794829	c	c/b/a	0.0496881	a	0.0259113	a	0.02228	a	a/b/c
		5	0.777832	a	0.910244	a	0.908473	a	b/a/a	0.0220523	c	0.0150084	c	0.0153956	b	a/b/b
		Total Sum	0.473203	b	0.772382	b	0.83682	b	c/b/a	0.0368057	b	0.019142	b	0.0151014	b	a/b/c
Model	Trait	Clipping	Complete Dataset		FI-1		FI-2		Comparison of Tukey's Test (Predictive Ability)	Complete Dataset		FI-1		FI-2		Comparison of Tukey's Test (Mean Squared Error)
			Predictive Ability	Tukey's Test	Predictive Ability	Tukey's Test	Predictive Ability	Tukey's Test		Mean Squared Error	Tukey's Test	Mean Squared Error	Tukey's Test	Mean Squared Error	Tukey's Test
MLP	Green Matter	2	0.540947	g	0.738153	e	0.844782	ab	c/b/a	0.0409548	b	0.0186942	c	0.0192487	e	a/b/c
		3	0.629622	f	0.794273	d	0.809489	d	b/a/a	0.0436259	a	0.0216236	a	0.0286752	cd	a/b/c
		4	0.739075	b	0.862715	b	0.829289	bcd	c/a/b	0.0324974	de	0.0168133	e	0.0259651	d	a/c/b
		5	0.734722	bc	0.853962	bc	0.733794	f	b/a/b	0.0278554	f	0.0148994	f	0.069222	a	a/c/b
		6	0.711002	bcd	0.795617	d	0.813113	cd	b/a/a	0.0316766	e	0.0174765	d	0.0235989	de	a/c/b
		7	0.669687	e	0.840707	c	0.732	f	c/a/b	0.0351409	c	0.0169016	e	0.0342306	bc	a/c/b
		8	0.777768	a	0.911041	a	0.857994	a	c/a/b	0.0363039	c	0.0167275	e	0.0243031	de	a/c/b
		9	0.681507	de	0.847891	bc	0.83561	abc	b/a/a	0.0349688	cd	0.0175087	d	0.0230474	de	a/b/c
		Total Sum	0.7038	cd	0.8088	d	0.76861	e	c/a/b	0.0370585	c	0.0193374	b	0.0356232	b	a/b/b
	Dry Matter	2	0.504576	f	0.810097	d	0.379845	f	b/a/c	0.0449112	a	0.0199477	a	0.0910482	a	a/c/b
		3	0.565856	e	0.701773	e	0.692365	d	b/a/a	0.0262857	d	0.0158127	d	0.0479755	c	b/c/a
		4	0.7735	ab	0.884158	b	0.893524	a	b/a/a	0.0304639	c	0.0140573	e	0.0173352	d	a/b/b
		5	0.722185	c	0.841983	c	0.685838	d	b/a/c	0.0277278	d	0.0126299	f	0.0486929	c	b/c/a
		6	0.731997	c	0.87109	b	0.846309	b	c/a/b	0.032222	bc	0.0154492	d	0.0219251	d	a/c/b
		7	0.660588	d	0.796444	d	0.711523	d	c/a/b	0.0341044	b	0.016974	c	0.0468682	c	a/c/b
		8	0.790315	a	0.90378	a	0.79949	c	b/a/b	0.0322419	bc	0.014413	e	0.0505999	c	a/c/b
		9	0.670783	d	0.835421	c	0.582384	e	b/a/c	0.0345176	b	0.0181067	b	0.0633972	b	a/b/c
		Total Sum	0.739817	bc	0.876491	b	0.878956	ab	b/a/a	0.032675	bc	0.0154885	d	0.0255761	d	a/c/b
	Regrowth	2	0.493146	f	0.808494	d	0.818562	b	b/a/a	0.0495259	a	0.0211869	b	0.0248314	de	a/b/c
		3	0.82042	a	0.922779	a	0.867199	a	c/a/b	0.0324291	d	0.0155384	e	0.0274131	cd	a/b/c
		4	0.693033	b	0.871765	b	0.75221	d	c/a/b	0.0339825	cd	0.0144309	f	0.040334	a	a/c/b
		5	0.578355	d	0.835226	c	0.657428	e	c/a/b	0.0359587	c	0.0154194	e	0.0397565	a	a/b/b
		6	0.592404	d	0.788444	e	0.811538	b	c/b/a	0.0514699	a	0.0244514	a	0.0279106	c	a/b/b
		7	0.644805	c	0.852316	c	0.782638	c	c/a/b	0.0334232	cd	0.0144961	f	0.0235692	e	a/b/c
		8	0.53324	e	0.787632	e	0.734559	d	c/a/b	0.0394151	b	0.0176116	d	0.0318344	b	a/b/b
		9	0.533931	e	0.78667	e	0.731597	d	c/a/b	0.0386364	b	0.0202596	c	0.0323792	b	a/b/b
		Total Sum	0.676619	bc	0.851288	c	0.854735	a	b/a/a	0.0344028	cd	0.0153547	e	0.0182318	f	a/b/c
	Leaf Dry Matter	2	0.600333	c	0.838885	a	0.749587	c	c/a/b	0.0393541	a	0.0187213	a	0.0403611	a	a/b/b
		5	0.748701	a	0.777142	b	0.823077	b	c/b/a	0.0256493	c	0.0159373	b	0.0223781	b	a/b/a
		Total Sum	0.695387	b	0.838645	a	0.848051	a	b/a/a	0.0322535	b	0.0154764	b	0.0181562	c	a/b/c
	Stem Dry Matter	2	0.385637	b	0.782227	b	0.535795	c	c/a/b	0.057911	a	0.0248272	a	0.0617376	a	a/b/c
		5	0.688272	a	0.854103	a	0.863933	a	b/a/a	0.0300787	c	0.0167454	b	0.0155618	c	a/b/b
		Total Sum	0.341332	c	0.641538	c	0.667078	b	b/a/a	0.0488037	b	0.0255476	a	0.0324523	b	a/b/c

## Sheet: Table S4
Supplementary Table S4. Number of scenarios identified as optimal by Tukey's test. The total number of scenarios corresponds to the number of phenotype clippings (33). The compared datasets encompassed the following: (i) the complete dataset, (ii) markers selected by at least two feature selection techniques (FI-1), and (iii) markers selected by all three employed feature selection techniques.
Model	Predictive ability			Mean Squared Error
	CD	FI-1	FI-2	CD	FI-1	FI-2
Semiparametric reproducing kernel Hilbert space	33	11	5	30	3	8
Bayesian ridge regression	21	3	1	12	6	4
Support vector machine	32	1	1	13	0	3
Random forest	25	28	32	10	16	26
Adaptive boosting	15	27	24	8	28	26
Multilayer perceptron	0	0	1	0	1	0

## Sheet: Table S5
Supplementary Table S5. Numbers of markers selected by the three feature selection (FS) methods. This evaluation was conducted for all phenotypes and clippings, along with their intersections (FI), considering markers selected by at least two feature selection techniques (FI-1) and markers selected by all three employed feature selection techniques.
Trait	Clipping	FS	Feature Quantity
Green Matter	2	FS-1	161
		FS-2	1002
		FS-3	798
		FI-1	105
		FI-2	9
	3	FS-1	132
		FS-2	1014
		FS-3	709
		FI-1	104
		FI-2	11
	4	FS-1	154
		FS-2	830
		FS-3	711
		FI-1	102
		FI-2	7
	5	FS-1	141
		FS-2	656
		FS-3	594
		FI-1	104
		FI-2	6
	6	FS-1	148
		FS-2	756
		FS-3	711
		FI-1	92
		FI-2	12
	7	FS-1	144
		FS-2	746
		FS-3	673
		FI-1	91
		FI-2	10
	8	FS-1	136
		FS-2	484
		FS-3	564
		FI-1	92
		FI-2	5
	9	FS-1	129
		FS-2	792
		FS-3	712
		FI-1	102
		FI-2	14
	Total	FS-1	130
		FS-2	795
		FS-3	636
		FI-1	99
		FI-2	15
Leaf Dry Matter	2	FS-1	167
		FS-2	993
		FS-3	774
		FI-1	108
		FI-2	7
	5	FS-1	146
		FS-2	717
		FS-3	679
		FI-1	101
		FI-2	14
	Total	FS-1	137
		FS-2	766
		FS-3	573
		FI-1	106
		FI-2	12
Stem Dry Matter	2	FS-1	146
		FS-2	1098
		FS-3	822
		FI-1	115
		FI-2	12
	5	FS-1	153
		FS-2	602
		FS-3	578
		FI-1	103
		FI-2	13
	Total	FS-1	163
		FS-2	1170
		FS-3	826
		FI-1	118
		FI-2	12
Dry Matter	2	FS-1	167
		FS-2	1109
		FS-3	807
		FI-1	99
		FI-2	6
	3	FS-1	169
		FS-2	870
		FS-3	676
		FI-1	107
		FI-2	5
	4	FS-1	146
		FS-2	794
		FS-3	694
		FI-1	107
		FI-2	18
	5	FS-1	146
		FS-2	780
		FS-3	617
		FI-1	81
		FI-2	7
	6	FS-1	144
		FS-2	754
		FS-3	685
		FI-1	94
		FI-2	17
	7	FS-1	154
		FS-2	808
		FS-3	713
		FI-1	99
		FI-2	9
	8	FS-1	143
		FS-2	636
		FS-3	628
		FI-1	88
		FI-2	9
	9	FS-1	151
		FS-2	745
		FS-3	704
		FI-1	94
		FI-2	7
	Total	FS-1	138
		FS-2	723
		FS-3	601
		FI-1	99
		FI-2	14
Regrowth	2	FS-1	156
		FS-2	1126
		FS-3	837
		FI-1	122
		FI-2	16
	3	FS-1	146
		FS-2	571
		FS-3	563
		FI-1	107
		FI-2	18
	4	FS-1	142
		FS-2	822
		FS-3	658
		FI-1	107
		FI-2	6
	5	FS-1	156
		FS-2	1112
		FS-3	782
		FI-1	96
		FI-2	11
	6	FS-1	150
		FS-2	922
		FS-3	686
		FI-1	107
		FI-2	13
	7	FS-1	175
		FS-2	922
		FS-3	751
		FI-1	111
		FI-2	23
	8	FS-1	156
		FS-2	982
		FS-3	721
		FI-1	99
		FI-2	15
	9	FS-1	171
		FS-2	1039
		FS-3	853
		FI-1	114
		FI-2	11
	Total	FS-1	145
		FS-2	838
		FS-3	727
		FI-1	104
		FI-2	16

## Sheet: Table S6
Supplementary Table S6. Number of scenarios in which the evaluated datasets were determined as the optimal choice based on Tukey's test. A total of 198 scenarios were evaluated, considering 6 models and 33 phenotype clippings.
	Predictive ability	Mean Squared Error
Complete Dataset	0 (0%)	0 (0%)
Markers selected by at least two feature selection techniques (FI-1)	168 (~84.85%)	136 (~68.69%)
Markers selected by all the three employed feature selection techniques	100 (~50.51%)	89 (~44.95%)

## Sheet: Table S7
Supplementary Table S7. Optimal scenarios identified by Tukey's test for model, phenotype, and dataset comparison. Models highlighted in red represent the most favorable choices for the respective dataset.
Dataset Configuration	Model	Predictive ability					Mean Squared Error
		Green Matter	Dry Matter	Regrowth	Leaf Dry Matter	Stem Dry Matter	Green Matter	Dry Matter	Regrowth	Leaf Dry Matter	Stem Dry Matter
Complete Dataset	Semiparametric reproducing kernel Hilbert space	4, 5, and 8	4 and 8	3	5	5	5	3	4 and total sum	5	5
	Bayesian ridge regression	4, 5, and 8	4 and 8	3	5	5	5	5	2023-04-03	5	5
	Support vector machine	4 and 8	4 and 8	3	5	5	5	2	4	5	5
	Random forest	4, 5, and 8	4, 5, and 8	3	5	5	5	3	7 and total sum	5	5
	Adaptive boosting	4, 5, and 8	8	3	5	5	5	3	7	5	5
	Multilayer perceptron	8	8	3	5	5	5	3,5	3, 4, 7 and total sum	5	5
Markers Selected by at Least Two Feature Selection Techniques (FI-1)	Semiparametric reproducing kernel Hilbert space	8	2023-08-04	3	5 and total sum	5	5	3, 4, 5, and 8	3	5 and total sum	Total sum
	Bayesian ridge regression	8	2023-08-04	3	2, 5, and total sum	5	4	3 and 5	4	2 and total sum	5
	Support vector machine	8	8	3	5	5	5	5	4	5 and total sum	5
	Random forest	4, 5, 6, and 8	8	3	5	5	5 and 6	5 and 8	3	5	5
	Adaptive boosting	4, 5, 6, and 8	5, 8, and total sum	3	5	5	4, 5, and 6	5, 8, and total sum	3 and total sum	5 and total sum	5
	Multilayer perceptron	8	8	3	2 and total sum	5	5	5	4 and 7	5 and total sum	5
Markers Selected by All The Three Employed Feature Selection Techniques (FI-2)	Semiparametric reproducing kernel Hilbert space	4 and 8	4	3	5 and total sum	5	9	4	3	T	5
	Bayesian ridge regression	4, 5, 9, and total sum	4, 8, and total sum	3	5 and total sum	5	9	3	7 and total sum	5 and total sum	5
	Support vector machine	4 and 9	4	3	5	5	4 and 9	4	3, 7, 8, and total sum	5	5
	Random forest	9 and total sum	4 and total sum	3	Total sum	5	9	4,T	3 and total sum	T	5
	Adaptive boosting	8, 9, and total sum	4, 9, and total sum	3	Total sum	5	9	4,6,9,T	3 and total sum	T	5 and total sum
	Multilayer perceptron	2, 8, and 9	4 and total sum	3 and total sum	Total sum	5	2, 6, 8, and 9	4,6,T	T	T	5

## Sheet: Table S8
Supplementary Table S8. Functional annotation of the transcripts physically linked to the major importance markers defined.
Chromosome	SNP Position	Phenotype/Clipping Association	Gini Importance	Transcript Start	Transcript End	Transcript ID	Enzyme	Gene Ontology Terms
1	3602030	Dry Matter/2	0.248102	3598955	3599293	DN66813_c0_g1	Transcription factor-like protein DPB	GO:0005737, GO:0005634, GO:0005667, GO:0003677, GO:0000981, GO:0046982, GO:0042023, GO:0000082, GO:0051726
1	3602030	Dry Matter/2	0.248102	3600810	3600408	DN72459_c0_g1	Transcription factor-like protein DPB	GO:0005737, GO:0005634, GO:0005667, GO:0003677, GO:0000981, GO:0046982, GO:0042023, GO:0000082, GO:0051726
1	3602030	Dry Matter/2	0.248102	3606241	3606958	DN85127_c1_g1	4-coumarate--CoA ligase-like 1	GO:0005777, GO:0005524, GO:0016405, GO:0004321
1	5918888	Green Matter/2	0.0873093	5915196	5915769	DN89084_c0_g1	3-ketoacyl-CoA synthase 10 {ECO:0000303|PubMed:18465198}	GO:0005783, GO:0005789, GO:0016021, GO:0005777, GO:0102756, GO:0006633, GO:0009409
1	5918888	Green Matter/2	0.0873093	5915633	5916152	DN74840_c1_g1	3-ketoacyl-CoA synthase 10 {ECO:0000303|PubMed:18465198}	GO:0005783, GO:0005789, GO:0016021, GO:0005777, GO:0102756, GO:0006633, GO:0009409
1	5918888	Green Matter/2	0.0873093	5915730	5914800	DN89084_c1_g1	3-ketoacyl-CoA synthase 1 {ECO:0000303|PubMed:10074711};3-ketoacyl-CoA synthase 4 {ECO:0000303|PubMed:18465198};3-ketoacyl-CoA synthase 10 {ECO:0000303|PubMed:18465198}	GO:0022626, GO:0005783, GO:0005789, GO:0016021, GO:0016020, GO:0009922, GO:0102756, GO:0070417, GO:0009409, GO:0009416, GO:0042761, GO:0010025, GO:0006633
1	5918888	Green Matter/2	0.0873093	5916004	5915528	DN84880_c0_g1	3-ketoacyl-CoA synthase 9 {ECO:0000303|PubMed:18465198}	GO:0005789, GO:0016021, GO:0102756, GO:0006633, GO:0009409
1	5918888	Green Matter/2	0.0873093	5921068	5921587	DN87697_c1_g1	Protein WHAT'S THIS FACTOR 1 homolog, chloroplastic {ECO:0000305}	GO:0009507, GO:0003729, GO:0000373, GO:0006397, GO:0015979
1	5918888	Green Matter/2	0.0873093	5921878	5921618	DN92024_c3_g2
1	5927892	Leaf Dry Matter/2	0.120233	5927725	5928559	DN65451_c0_g2	Protein TIFY 11b {ECO:0000305}	GO:0005634, GO:0031347, GO:2000022
1	5927892	Leaf Dry Matter/2	0.120233	5928559	5927998	DN65451_c0_g3	Protein TIFY 11b {ECO:0000305}	GO:0005634, GO:0031347, GO:2000022
1	6758756	Regrowth/2	0.0834615	6757183	6756739	DN83885_c1_g2	Membrane-associated progesterone-binding protein 4 {ECO:0000303|Ref.7}	GO:0012505, GO:0016021, GO:0016020
1	6758756	Regrowth/2	0.0834615	6761535	6761812	DN92221_c2_g1
1	6758756	Regrowth/2	0.0834615	6761796	6761532	DN91118_c5_g1	Glutathione S-transferase	GO:0005737, GO:0004364, GO:0016034, GO:0006749
1	6758756	Regrowth/2	0.0834615	6763726	6764490	DN87101_c0_g1	BTB/POZ domain-containing protein NPY2;BTB/POZ domain-containing protein NPY5	GO:0071944, GO:0009958, GO:0016567
1	8916524	Regrowth/9	0.0954423	8915411	8914400	DN73443_c2_g1	Subtilisin-like protease SBT1.6 {ECO:0000303|PubMed:16193095}	GO:0005886, GO:0004252, GO:0008236
1	8916524	Regrowth/9	0.0954423	8916073	8916336	DN61834_c4_g2
1	8916524	Regrowth/9	0.0954423	8916337	8916028	DN59818_c2_g4
1	8916524	Regrowth/9	0.0954423	8916342	8916037	DN92072_c5_g1	Altered inheritance rate of mitochondria protein 25	GO:0005739, GO:0005886, GO:0017128, GO:0034605, GO:0034599
1	8916524	Regrowth/9	0.0954423	8918403	8919467	DN71029_c0_g1	Actin-depolymerizing factor 5	GO:0015629, GO:0005737, GO:0051015, GO:0051017
1	8916524	Regrowth/9	0.0954423	8918681	8918117	DN87804_c1_g2	Actin-depolymerizing factor 5	GO:0015629, GO:0005737, GO:0051015, GO:0051017
1	11178365	Dry Matter/5, Green Matter/5, Green Matter/9, Leaf Dry Matter/5	0.133, 0.394, 0.119, 0.129	11174855	11175173	DN91018_c1_g3	Trifunctional UDP-glucose 4,6-dehydratase/UDP-4-keto-6-deoxy-D-glucose 3,5-epimerase/UDP-4-keto-L-rhamnose-reductase RHM3 {ECO:0000305|PubMed:17190829}	GO:0005829, GO:0009506, GO:0008460, GO:0016853, GO:0016491, GO:0050377, GO:0010280, GO:0010315, GO:0051555
1	11178365	Dry Matter/5, Green Matter/5, Green Matter/9, Leaf Dry Matter/5	0.133, 0.394, 0.119, 0.129	11174865	11175260	DN68526_c0_g1	Trifunctional UDP-glucose 4,6-dehydratase/UDP-4-keto-6-deoxy-D-glucose 3,5-epimerase/UDP-4-keto-L-rhamnose-reductase RHM3 {ECO:0000305|PubMed:17190829};Bifunctional dTDP-4-dehydrorhamnose 3,5-epimerase/dTDP-4-dehydrorhamnose reductase {ECO:0000305};Trifunctional UDP-glucose 4,6-dehydratase/UDP-4-keto-6-deoxy-D-glucose 3,5-epimerase/UDP-4-keto-L-rhamnose-reductase RHM1 {ECO:0000305|PubMed:17190829}	GO:0005829, GO:0009506, GO:0008460, GO:0016853, GO:0016491, GO:0050377, GO:0010280, GO:0010315, GO:0051555, GO:0010253, GO:0005886, GO:0008830, GO:0008831, GO:0016616, GO:0010489, GO:0010490, GO:0071555, GO:0019305, GO:0005739, GO:0030154
1	11178365	Dry Matter/5, Green Matter/5, Green Matter/9, Leaf Dry Matter/5	0.133, 0.394, 0.119, 0.129	11175252	11176197	DN68526_c0_g4	Trifunctional UDP-glucose 4,6-dehydratase/UDP-4-keto-6-deoxy-D-glucose 3,5-epimerase/UDP-4-keto-L-rhamnose-reductase RHM1 {ECO:0000305|PubMed:17190829}	GO:0005829, GO:0005739, GO:0009506, GO:0008460, GO:0016853, GO:0016491, GO:0050377, GO:0010280, GO:0010315, GO:0030154, GO:0071555, GO:0051555, GO:0042127
1	11178365	Dry Matter/5, Green Matter/5, Green Matter/9, Leaf Dry Matter/5	0.133, 0.394, 0.119, 0.129	11175837	11174804	DN77992_c1_g1	Trifunctional UDP-glucose 4,6-dehydratase/UDP-4-keto-6-deoxy-D-glucose 3,5-epimerase/UDP-4-keto-L-rhamnose-reductase RHM3 {ECO:0000305|PubMed:17190829}	GO:0005829, GO:0009506, GO:0008460, GO:0016853, GO:0016491, GO:0050377, GO:0010280, GO:0010315, GO:0051555
1	11178365	Dry Matter/5, Green Matter/5, Green Matter/9, Leaf Dry Matter/5	0.133, 0.394, 0.119, 0.129	11177248	11176664	DN68526_c0_g2	Bifunctional dTDP-4-dehydrorhamnose 3,5-epimerase/dTDP-4-dehydrorhamnose reductase {ECO:0000305}	GO:0005886, GO:0009506, GO:0008830, GO:0008831, GO:0016616, GO:0010489, GO:0010490, GO:0071555, GO:0019305
1	12048129	Green Matter/4	0.0817731	12045182	12045469	DN85328_c3_g1
1	12048129	Green Matter/4	0.0817731	12046838	12047210	DN90895_c1_g2
1	12048129	Green Matter/4	0.0817731	12050316	12050604	DN92055_c5_g1
1	12048129	Green Matter/4	0.0817731	12050566	12050337	DN92407_c3_g1
1	12048129	Green Matter/4	0.0817731	12050606	12050353	DN70501_c2_g1
1	14847909	Dry Matter/2	0.23666	14851807	14851183	DN74650_c1_g3
1	14847909	Dry Matter/2	0.23666	14851833	14852628	DN74650_c1_g1	Sperm-associated antigen 1A	GO:0005737, GO:0005829
1	14847909	Dry Matter/2	0.23666	14852724	14851743	DN72444_c0_g1	Sperm-associated antigen 1A	GO:0005737, GO:0005829
1	22557144	Regrowth/4	0.0913515	22552665	22552287	DN89753_c2_g1
1	22557144	Regrowth/4	0.0913515	22558990	22559356	DN72187_c4_g2
1	22557144	Regrowth/4	0.0913515	22559802	22559512	DN77388_c0_g1
1	22557144	Regrowth/4	0.0913515	22560516	22560246	DN78712_c0_g2
1	51382809	Green Matter/8	0.107959	51379525	51379886	DN78004_c0_g1	Malate dehydrogenase, cytoplasmic {ECO:0000303|Ref.1}	GO:0005886, GO:0030060, GO:0005975, GO:0006108, GO:0006734, GO:0006107
1	51382809	Green Matter/8	0.107959	51386990	51386678	DN69968_c0_g3	Myb-related protein 306;Transcription factor MYB4 {ECO:0000305};Transcription factor MYB30 {ECO:0000305}	GO:0005634, GO:0003677, GO:0045893
1	59423187	Stem Dry Matter/2	0.26996	59419823	59419185	DN64929_c2_g2
1	59423187	Stem Dry Matter/2	0.26996	59427372	59428373	DN77232_c2_g1
1	62623601	Stem Dry Matter/Total Sum	0.14835	62621154	62621601	DN71302_c0_g2	ARF guanine-nucleotide exchange factor GNOM	GO:0005829, GO:0005768, GO:0010008, GO:0005886, GO:0005085, GO:0042802, GO:0042803, GO:0010540, GO:0007155, GO:0071555, GO:0070417, GO:0000911, GO:0009793
1	62623601	Stem Dry Matter/Total Sum	0.14835	62622551	62619731	DN71302_c0_g3	ARF guanine-nucleotide exchange factor GNL1;ARF guanine-nucleotide exchange factor GNOM	GO:0005829, GO:0005794, GO:0000139, GO:0005085, GO:0006897, GO:0080119, GO:0015031, GO:0032012, GO:0006890, GO:0005768, GO:0010008, GO:0005886, GO:0042802, GO:0042803, GO:0010540, GO:0007155, GO:0071555, GO:0070417, GO:0000911, GO:0009793
1	70240593	Dry Matter/Total Sum, Green Matter/8	0.129, 0.439	70236251	70238578	DN91367_c1_g2
1	70240593	Dry Matter/Total Sum, Green Matter/8	0.129, 0.439	70236369	70235645	DN73962_c1_g1	Renalase {ECO:0000250|UniProtKB:Q48MT7}	GO:0050660, GO:0051287, GO:0050661
1	70240593	Dry Matter/Total Sum, Green Matter/8	0.129, 0.439	70241197	70241684	DN65798_c1_g5	Patatin-like protein 7	GO:0005886, GO:0047617, GO:0004620, GO:0019374, GO:0016042, GO:0006644, GO:0040008
1	70240593	Dry Matter/Total Sum, Green Matter/8	0.129, 0.439	70241561	70240676	DN65798_c1_g1	Patatin-like protein 7	GO:0005886, GO:0047617, GO:0004620, GO:0019374, GO:0016042, GO:0006644, GO:0040008
1	70240593	Dry Matter/Total Sum, Green Matter/8	0.129, 0.439	70243020	70242555	DN80775_c1_g2	Patatin-like protein 3;Patatin-like protein 8	GO:0016787, GO:0006952
2	2268441	Regrowth/9	0.368966	2265414	2264627	DN92198_c4_g1
2	2268441	Regrowth/9	0.368966	2272425	2272732	DN74648_c2_g1
2	5498836	Regrowth/4	0.0854588	5496862	5496586	DN88838_c2_g2
2	5498836	Regrowth/4	0.0854588	5497560	5497258	DN74008_c0_g1
2	41678485	Regrowth/6	0.119204	41677728	41678023	DN88838_c2_g2
2	41678485	Regrowth/6	0.119204	41681686	41682343	DN59956_c2_g1
2	41678485	Regrowth/6	0.119204	41682454	41684045	DN85683_c0_g1
2	41678485	Regrowth/6	0.119204	41682735	41682432	DN91174_c2_g4
2	49786056	Stem Dry Matter/2	0.105073	49784917	49785178	DN70501_c2_g1
2	49786056	Stem Dry Matter/2	0.105073	49784964	49785194	DN92407_c3_g1
2	49786056	Stem Dry Matter/2	0.105073	49785215	49784925	DN92055_c5_g1
2	49786056	Stem Dry Matter/2	0.105073	49786005	49786595	DN58994_c4_g1	Myb-related protein 306;Transcription factor MYB60 {ECO:0000303|PubMed:9839469};Transcription factor MYB60 {ECO:0000303|PubMed:18647406}	GO:0005634, GO:0003677, GO:0003700, GO:0000976, GO:0080148, GO:0009737, GO:0009646, GO:0009733, GO:0009637, GO:0009409, GO:0009416, GO:1902074, GO:0009744, GO:0009411, GO:0009414, GO:0009651
2	49786056	Stem Dry Matter/2	0.105073	49786741	49787164	DN76319_c2_g1	Transcription factor MYB94 {ECO:0000303|PubMed:9839469};Myb-related protein 306	GO:0005634, GO:0003700, GO:0043565, GO:0000976, GO:0045893, GO:1904278, GO:0006355, GO:0009733, GO:0009414
2	49786056	Stem Dry Matter/2	0.105073	49787052	49787738	DN88364_c1_g1	Myb-related protein 306	GO:0005634
2	49786056	Stem Dry Matter/2	0.105073	49788044	49786983	DN76319_c4_g2
2	52975994	Regrowth/7	0.20999	52972075	52972424	DN74990_c0_g2
2	64677456	Dry Matter/9	0.0871238	64674447	64675358	DN77139_c1_g1	Indole-3-acetic acid-amido synthetase GH3.8 {ECO:0000305}	GO:0005737, GO:0016881, GO:0016208, GO:0010279, GO:0010252, GO:0006952, GO:0009555
2	64677456	Dry Matter/9	0.0871238	64675018	64674410	DN63283_c0_g1	Indole-3-acetic acid-amido synthetase GH3.8 {ECO:0000305};Probable indole-3-acetic acid-amido synthetase GH3.1	GO:0005737, GO:0016881, GO:0016208, GO:0010279, GO:0010252, GO:0006952, GO:0009555, GO:1900424, GO:0009733
2	64677456	Dry Matter/9	0.0871238	64682359	64682668	DN83067_c0_g1	FRIGIDA-like protein 3	GO:0009536, GO:0030154
2	64677456	Dry Matter/9	0.0871238	64682428	64681984	DN80966_c0_g1	FRIGIDA-like protein 3	GO:0009536, GO:0030154
2	67098278	Dry Matter/4	0.163079	67094490	67093879	DN72905_c0_g1	Dihydroneopterin aldolase 1 {ECO:0000305};Dihydroneopterin aldolase 2 {ECO:0000305}	GO:0005737, GO:0004150, GO:0046656, GO:0006760
2	67098278	Dry Matter/4	0.163079	67101745	67102220	DN72984_c1_g2
2	71727123	Green Matter/4	0.0770476	71723998	71724817	DN88440_c4_g1	Sugar transport protein MST6 {ECO:0000305}	GO:0016021, GO:0005886, GO:0015145
2	71727123	Green Matter/4	0.0770476	71724470	71724823	DN62517_c2_g5	Sugar transport protein MST3 {ECO:0000305}	GO:0016021, GO:0015145
2	71727123	Green Matter/4	0.0770476	71724673	71725134	DN69828_c1_g4	Sugar transport protein MST3 {ECO:0000305}	GO:0016021, GO:0015145
2	71727123	Green Matter/4	0.0770476	71724778	71724459	DN89543_c1_g3	Sugar transport protein MST3 {ECO:0000305};Sugar transport protein MST6 {ECO:0000305}	GO:0016021, GO:0015145, GO:0015293
2	71727123	Green Matter/4	0.0770476	71724906	71725223	DN88440_c5_g1	Sugar transport protein MST6 {ECO:0000305};Sugar transport protein MST3 {ECO:0000305}	GO:0016021, GO:0005886, GO:0015145
2	71727123	Green Matter/4	0.0770476	71725037	71725680	DN69828_c0_g1	Sugar transport protein MST6 {ECO:0000305}	GO:0016021, GO:0005886, GO:0015145
2	71727123	Green Matter/4	0.0770476	71725122	71724675	DN69828_c1_g2	Sugar transport protein MST3 {ECO:0000305}	GO:0016021, GO:0015145
2	71727123	Green Matter/4	0.0770476	71725183	71724819	DN69828_c1_g3	Sugar transport protein MST6 {ECO:0000305}	GO:0016021, GO:0005886, GO:0015145
2	71727123	Green Matter/4	0.0770476	71725455	71724470	DN65192_c3_g3	Sugar transport protein MST4 {ECO:0000305}	GO:0016021, GO:0005886, GO:0005358, GO:0009737, GO:0009651
2	71727123	Green Matter/4	0.0770476	71725785	71724985	DN88440_c5_g2	Sugar transport protein MST6 {ECO:0000305}	GO:0016021, GO:0005886, GO:0015145
2	71727123	Green Matter/4	0.0770476	71727517	71727813	DN90485_c1_g2
2	71727123	Green Matter/4	0.0770476	71730677	71730978	DN74008_c0_g1
2	72127644	Green Matter/6	0.104463	72130649	72129278	DN62703_c0_g2
3	780392	Green Matter/3	0.0846156	775480	774712	DN78485_c1_g1	FCS-Like Zinc finger 1 {ECO:0000303|PubMed:24901469};FCS-Like Zinc finger 2 {ECO:0000303|PubMed:24901469}	GO:0005737, GO:0005634, GO:0019900, GO:0046872, GO:0019902, GO:0071456, GO:0009749, GO:1905582, GO:0042594
3	780392	Green Matter/3	0.0846156	777709	778287	DN92370_c2_g1	Shewanella-like protein phosphatase 1 {ECO:0000303|PubMed:21976480}	GO:0009507, GO:0030145, GO:0016791
3	780392	Green Matter/3	0.0846156	780624	780885	DN70501_c2_g1
3	780392	Green Matter/3	0.0846156	780922	780632	DN92055_c5_g1
3	780392	Green Matter/3	0.0846156	781602	782459	DN71855_c0_g2
3	780392	Green Matter/3	0.0846156	781981	781576	DN63968_c0_g2	FCS-Like Zinc finger 1 {ECO:0000303|PubMed:24901469}	GO:0005737, GO:0005634, GO:0019900, GO:0046872, GO:0019902, GO:0071456, GO:0009749, GO:1905582, GO:0042594
3	780392	Green Matter/3	0.0846156	782786	781912	DN71855_c0_g1	MYG1 exonuclease {ECO:0000305};MYG1 protein C694.04c	GO:0005737, GO:0005759, GO:0005739, GO:0005730, GO:0005654, GO:0005634, GO:0004518, GO:0005829
3	780392	Green Matter/3	0.0846156	783088	783363	DN88498_c2_g1	MYG1 exonuclease {ECO:0000305};MYG1 protein C694.04c	GO:0005737, GO:0005759, GO:0005739, GO:0005730, GO:0005654, GO:0005634, GO:0004518, GO:0005829
3	1134135	Green Matter/5	0.10345	1131615	1131867	DN90011_c5_g1
3	1134135	Green Matter/5	0.10345	1131867	1131615	DN84073_c1_g1
3	1134135	Green Matter/5	0.10345	1133660	1134379	DN58624_c1_g1
3	1134135	Green Matter/5	0.10345	1134467	1133789	DN58624_c1_g2
3	9317234	Regrowth/7	0.136566	9314767	9315028	DN92411_c3_g1
3	15115892	Green Matter/3	0.279683	15116186	15116531	DN68616_c1_g2
3	15115892	Green Matter/3	0.279683	15116915	15116593	DN64750_c2_g2
3	15115892	Green Matter/3	0.279683	15118371	15118627	DN92413_c6_g1
3	15115892	Green Matter/3	0.279683	15118576	15118998	DN92413_c6_g2
3	15115892	Green Matter/3	0.279683	15118615	15118948	DN63580_c0_g1
3	15115892	Green Matter/3	0.279683	15118623	15118140	DN63607_c1_g1	Uncharacterized mitochondrial protein AtMg00310;LINE-1 retrotransposable element ORF2 protein;Transposon TX1 uncharacterized 149 kDa protein	GO:0005739, GO:0046872, GO:0003964, GO:0006310, GO:0090305, GO:0032197
3	15115892	Green Matter/3	0.279683	15118638	15119023	DN59037_c0_g1
3	15115892	Green Matter/3	0.279683	15118638	15119036	DN63580_c0_g2
3	15115892	Green Matter/3	0.279683	15118672	15118345	DN64020_c2_g3
3	15115892	Green Matter/3	0.279683	15118936	15118531	DN59037_c1_g1
3	15115892	Green Matter/3	0.279683	15118948	15118613	DN59037_c1_g2
3	15115892	Green Matter/3	0.279683	15119072	15119451	DN62166_c1_g1
3	15115892	Green Matter/3	0.279683	15119197	15119608	DN92413_c6_g3
3	15115892	Green Matter/3	0.279683	15119295	15118983	DN92415_c9_g1
3	15115892	Green Matter/3	0.279683	15119447	15119104	DN61033_c1_g2
3	15115892	Green Matter/3	0.279683	15119518	15119830	DN86079_c2_g3
3	15115892	Green Matter/3	0.279683	15119524	15119952	DN59798_c2_g1
3	15115892	Green Matter/3	0.279683	15119534	15119806	DN92413_c5_g1
3	15115892	Green Matter/3	0.279683	15119612	15119317	DN86325_c1_g1
3	15115892	Green Matter/3	0.279683	15119644	15119964	DN78301_c2_g3
3	15115892	Green Matter/3	0.279683	15119661	15119354	DN71673_c1_g2
3	15115892	Green Matter/3	0.279683	15119663	15119415	DN64835_c0_g1
3	15115892	Green Matter/3	0.279683	15119678	15119917	DN60624_c1_g1
3	15115892	Green Matter/3	0.279683	15119687	15119964	DN61222_c3_g3
3	15115892	Green Matter/3	0.279683	15119836	15119389	DN72295_c1_g2
3	15115892	Green Matter/3	0.279683	15119964	15119687	DN78301_c2_g4
3	15115892	Green Matter/3	0.279683	15119964	15120739	DN79343_c0_g5
3	46155579	Regrowth/2	0.371818	46150902	46151275	DN60337_c0_g2
3	46155579	Regrowth/2	0.371818	46150922	46151294	DN60337_c0_g1
3	46155579	Regrowth/2	0.371818	46151310	46150996	DN60337_c0_g3
3	46155579	Regrowth/2	0.371818	46154651	46155035	DN89780_c1_g2
3	46155579	Regrowth/2	0.371818	46154884	46155271	DN87303_c1_g1
3	46155579	Regrowth/2	0.371818	46155372	46155086	DN89780_c1_g1
3	46155579	Regrowth/2	0.371818	46155762	46156033	DN61834_c4_g2
3	46155579	Regrowth/2	0.371818	46156057	46155735	DN92072_c5_g1	Altered inheritance rate of mitochondria protein 25	GO:0005739, GO:0005886, GO:0017128, GO:0034605, GO:0034599
3	46155579	Regrowth/2	0.371818	46156058	46155731	DN59818_c2_g4
3	52378212	Dry Matter/5, Green Matter/5, Leaf Dry Matter/5, Leaf Dry Matter/Total Sum	0.156, 0.294, 0.133, 0.099	52373263	52373581	DN82633_c1_g2	Phosphatidylinositol/phosphatidylcholine transfer protein SFH4;Phosphatidylinositol/phosphatidylcholine transfer protein SFH6;Phosphatidylinositol/phosphatidylcholine transfer protein SFH8	GO:0000139, GO:0005886
3	52378212	Dry Matter/5, Green Matter/5, Leaf Dry Matter/5, Leaf Dry Matter/Total Sum	0.156, 0.294, 0.133, 0.099	52373578	52373263	DN64082_c0_g1	Phosphatidylinositol/phosphatidylcholine transfer protein SFH8;Phosphatidylinositol/phosphatidylcholine transfer protein SFH4	GO:0000139, GO:0005886
3	52378212	Dry Matter/5, Green Matter/5, Leaf Dry Matter/5, Leaf Dry Matter/Total Sum	0.156, 0.294, 0.133, 0.099	52378743	52379111	DN78984_c0_g2	Proteasome subunit alpha type-1-B	GO:0005829, GO:0005634, GO:0009506, GO:0000502, GO:0005839, GO:0019773, GO:0010498
3	52378212	Dry Matter/5, Green Matter/5, Leaf Dry Matter/5, Leaf Dry Matter/Total Sum	0.156, 0.294, 0.133, 0.099	52378914	52379279	DN78984_c0_g3	Proteasome subunit alpha type-1	GO:0005737, GO:0005634, GO:0005839, GO:0019773, GO:0010498
3	52378212	Dry Matter/5, Green Matter/5, Leaf Dry Matter/5, Leaf Dry Matter/Total Sum	0.156, 0.294, 0.133, 0.099	52381354	52381659	DN78984_c0_g1	Proteasome subunit alpha type-1	GO:0005737, GO:0005634, GO:0005839, GO:0019773, GO:0010498
3	52378212	Dry Matter/5, Green Matter/5, Leaf Dry Matter/5, Leaf Dry Matter/Total Sum	0.156, 0.294, 0.133, 0.099	52382175	52381665	DN71801_c0_g3	Proteasome subunit alpha type-1	GO:0005737, GO:0005634, GO:0005839, GO:0019773, GO:0010498
3	52378212	Dry Matter/5, Green Matter/5, Leaf Dry Matter/5, Leaf Dry Matter/Total Sum	0.156, 0.294, 0.133, 0.099	52382857	52383542	DN88548_c1_g2	Aspartic proteinase 36 {ECO:0000303|PubMed:27872247};Aspartic proteinase 39 {ECO:0000303|PubMed:27872247}	GO:0031225, GO:0005737, GO:0005829, GO:0005886, GO:0090406, GO:0004190, GO:0009555, GO:0009846, GO:0009860, GO:0010183, GO:0030163, GO:0006508
3	58121164	Regrowth/3	0.392749	58124003	58124436	DN83581_c0_g1
3	58174943	Dry Matter/5, Dry Matter/7, Green Matter/7, Leaf Dry Matter/Total Sum	0.369, 0.088, 0.095, 0.145	58170573	58170836	DN92024_c3_g2
4	3959984	Regrowth/7	0.218907	3964656	3963915	DN62556_c1_g1	Mini zinc finger protein 1	GO:0005737, GO:0005634, GO:0003700, GO:0046872, GO:0000976
4	9291205	Regrowth/8	0.0896586	9286742	9285019	DN85079_c0_g1
4	9291205	Regrowth/8	0.0896586	9294013	9294324	DN59818_c2_g4
4	9291205	Regrowth/8	0.0896586	9294016	9294333	DN92072_c5_g1	Altered inheritance rate of mitochondria protein 25	GO:0005739, GO:0005886, GO:0017128, GO:0034605, GO:0034599
4	9291205	Regrowth/8	0.0896586	9294285	9294014	DN59818_c2_g5
4	9291205	Regrowth/8	0.0896586	9294311	9294045	DN61834_c4_g2
4	9291205	Regrowth/8	0.0896586	9295494	9296449	DN84649_c1_g2
4	9291205	Regrowth/8	0.0896586	9295909	9295363	DN67033_c0_g1
4	14151549	Green Matter/2, Leaf Dry Matter/2	0.536, 0.339	14147826	14148107	DN70501_c2_g1
4	14151549	Green Matter/2, Leaf Dry Matter/2	0.536, 0.339	14148112	14147853	DN92055_c5_g1
4	14151549	Green Matter/2, Leaf Dry Matter/2	0.536, 0.339	14148398	14148662	DN61834_c4_g2
4	14151549	Green Matter/2, Leaf Dry Matter/2	0.536, 0.339	14148422	14148692	DN59818_c2_g5
4	14151549	Green Matter/2, Leaf Dry Matter/2	0.536, 0.339	14148692	14148367	DN59818_c2_g4
4	14151549	Green Matter/2, Leaf Dry Matter/2	0.536, 0.339	14148694	14148371	DN92072_c5_g1	Altered inheritance rate of mitochondria protein 25	GO:0005739, GO:0005886, GO:0017128, GO:0034605, GO:0034599
4	25045056	Regrowth/5	0.179317	25044102	25045355	DN88735_c0_g1	RNA demethylase ALKBH10B {ECO:0000305}	GO:0032451, GO:0046872, GO:0003729, GO:1990931, GO:0006402
4	25045056	Regrowth/5	0.179317	25045115	25045441	DN83624_c1_g3
4	25045056	Regrowth/5	0.179317	25045355	25044921	DN90901_c1_g1
4	25045056	Regrowth/5	0.179317	25046764	25046259	DN83624_c1_g1	RNA demethylase ALKBH10B {ECO:0000305}	GO:0032451, GO:0046872, GO:0003729, GO:1990931, GO:0006402
4	25045056	Regrowth/5	0.179317	25047378	25046926	DN71468_c0_g2
4	25045056	Regrowth/5	0.179317	25048105	25047339	DN71468_c0_g1
4	25045056	Regrowth/5	0.179317	25048425	25049998	DN77535_c0_g1
5	10809190	Stem Dry Matter/2	0.151909	10806421	10805844	DN62812_c1_g1	Glycerophosphodiester phosphodiesterase GDPD4 {ECO:0000305}	GO:0016021, GO:0008889, GO:0006071
5	10809190	Stem Dry Matter/2	0.151909	10809358	10809589	DN77996_c0_g1	Probable solanesyl-diphosphate synthase 3, chloroplastic {ECO:0000305};Solanesyl-diphosphate synthase 2, chloroplastic {ECO:0000303|PubMed:20421194}	GO:0009507, GO:0046872, GO:0008299, GO:0009536, GO:0004337, GO:0004659
5	10809190	Stem Dry Matter/2	0.151909	10813994	10810596	DN90414_c2_g1
5	58853938	Regrowth/4	0.613778	58857380	58857898	DN91398_c0_g1
6	27936260	Dry Matter/3	0.111471	27940640	27940246	DN71614_c2_g1
6	44238660	Regrowth/9	0.143971	44242237	44242527	DN92055_c5_g1
6	44238660	Regrowth/9	0.143971	44242527	44242274	DN70501_c2_g1
7	19129582	Regrowth/6	0.255093	19129069	19129440	DN68681_c0_g1	Auxin-responsive protein IAA4	GO:0005634, GO:0009734
7	19129582	Regrowth/6	0.255093	19130506	19129459	DN81791_c0_g1	Auxin-responsive protein IAA4	GO:0005634, GO:0009734
7	19129582	Regrowth/6	0.255093	19131391	19131082	DN68681_c0_g4
7	42826434	Dry Matter/4, Dry Matter/7, Dry Matter/8, Dry Matter/Total Sum, Green Matter/4, Green Matter/Total Sum, Leaf Dry Matter/Total Sum, Regrowth/8, Regrowth/Total Sum	0.258, 0.305, 0.218, 0.274, 0.646, 0.228, 0.410, 0.426, 0.229	42822392	42822686	DN92326_c7_g2
7	42826434	Dry Matter/4, Dry Matter/7, Dry Matter/8, Dry Matter/Total Sum, Green Matter/4, Green Matter/Total Sum, Leaf Dry Matter/Total Sum, Regrowth/8, Regrowth/Total Sum	0.258, 0.305, 0.218, 0.274, 0.646, 0.228, 0.410, 0.426, 0.229	42822526	42822845	DN91682_c3_g2	Phenylacetaldehyde reductase {ECO:0000303|PubMed:20650544};Cinnamoyl-CoA reductase 1 {ECO:0000303|PubMed:24985707, ECO:0000303|PubMed:25217505};Cinnamoyl-CoA reductase 1 {ECO:0000305};Tetraketide alpha-pyrone reductase 1	GO:0016491, GO:0005737, GO:0016621, GO:0000166, GO:0007623, GO:0010597, GO:0009809, GO:0009699, GO:0016616, GO:0006952, GO:0005783, GO:0005634, GO:0009555, GO:0010584, GO:0048316
7	42826434	Dry Matter/4, Dry Matter/7, Dry Matter/8, Dry Matter/Total Sum, Green Matter/4, Green Matter/Total Sum, Leaf Dry Matter/Total Sum, Regrowth/8, Regrowth/Total Sum	0.258, 0.305, 0.218, 0.274, 0.646, 0.228, 0.410, 0.426, 0.229	42822771	42822341	DN92411_c5_g2
7	42826434	Dry Matter/4, Dry Matter/7, Dry Matter/8, Dry Matter/Total Sum, Green Matter/4, Green Matter/Total Sum, Leaf Dry Matter/Total Sum, Regrowth/8, Regrowth/Total Sum	0.258, 0.305, 0.218, 0.274, 0.646, 0.228, 0.410, 0.426, 0.229	42823900	42823573	DN91031_c2_g1	Polyadenylate-binding protein RBP47C';RNA-binding protein L {ECO:0000303|PubMed:20217123}	GO:0010494, GO:0005829, GO:0005634, GO:0003729, GO:0008143, GO:0034605, GO:0006397, GO:0005737
7	42826434	Dry Matter/4, Dry Matter/7, Dry Matter/8, Dry Matter/Total Sum, Green Matter/4, Green Matter/Total Sum, Leaf Dry Matter/Total Sum, Regrowth/8, Regrowth/Total Sum	0.258, 0.305, 0.218, 0.274, 0.646, 0.228, 0.410, 0.426, 0.229	42827903	42827488	DN78529_c0_g1	DEAD-box ATP-dependent RNA helicase 25	GO:0005524, GO:0016887, GO:0003723
7	42826434	Dry Matter/4, Dry Matter/7, Dry Matter/8, Dry Matter/Total Sum, Green Matter/4, Green Matter/Total Sum, Leaf Dry Matter/Total Sum, Regrowth/8, Regrowth/Total Sum	0.258, 0.305, 0.218, 0.274, 0.646, 0.228, 0.410, 0.426, 0.229	42830407	42830773	DN78268_c1_g2
7	42826434	Dry Matter/4, Dry Matter/7, Dry Matter/8, Dry Matter/Total Sum, Green Matter/4, Green Matter/Total Sum, Leaf Dry Matter/Total Sum, Regrowth/8, Regrowth/Total Sum	0.258, 0.305, 0.218, 0.274, 0.646, 0.228, 0.410, 0.426, 0.229	42830590	42831767	DN85036_c0_g1
7	43749191	Dry Matter/3	0.2199	43745383	43745105	DN87407_c0_g1
7	43749191	Dry Matter/3	0.2199	43748265	43747985	DN64763_c1_g1	E3 ubiquitin-protein ligase SINAT5 {ECO:0000305}	GO:0005737, GO:0005634, GO:0061630, GO:0008270, GO:0016567
7	43749191	Dry Matter/3	0.2199	43748265	43747988	DN65961_c3_g1
7	43749191	Dry Matter/3	0.2199	43748933	43749538	DN65203_c0_g1	Cinnamoyl-CoA reductase-like SNL6 {ECO:0000305}	GO:0003854, GO:0016616, GO:0042742, GO:0009809
7	43749191	Dry Matter/3	0.2199	43749446	43749812	DN82034_c1_g1	Cinnamoyl-CoA reductase-like SNL6 {ECO:0000305}	GO:0003854, GO:0016616, GO:0042742, GO:0009809
7	43749191	Dry Matter/3	0.2199	43749788	43749480	DN65203_c0_g3	Cinnamoyl-CoA reductase-like SNL6 {ECO:0000305}	GO:0003854, GO:0016616, GO:0042742, GO:0009809
7	43749191	Dry Matter/3	0.2199	43753312	43753568	DN82223_c4_g4
7	43749191	Dry Matter/3	0.2199	43753415	43754060	DN73479_c1_g1
7	53131598	Regrowth/5	0.296178	53127527	53127175	DN77132_c1_g3	G-type lectin S-receptor-like serine/threonine-protein kinase At1g11330;G-type lectin S-receptor-like serine/threonine-protein kinase SD1-1;Receptor-like serine/threonine-protein kinase SD1-8	GO:0005576, GO:0016021, GO:0005886, GO:0005524, GO:0005516, GO:0030246, GO:0004672, GO:0106310, GO:0004674, GO:0004712, GO:0006955, GO:0006468, GO:0048544, GO:0009506, GO:0031625, GO:0005773
7	53131598	Regrowth/5	0.296178	53129629	53129375	DN62551_c0_g2	Receptor-like serine/threonine-protein kinase SD1-7;G-type lectin S-receptor-like serine/threonine-protein kinase At1g11330	GO:0016021, GO:0005634, GO:0005886, GO:0005524, GO:0030246, GO:0004672, GO:0106310, GO:0004674, GO:0004712, GO:0031625, GO:0009738, GO:0071215, GO:0046777, GO:0006468, GO:0005576, GO:0005516, GO:0006955
7	53131598	Regrowth/5	0.296178	53130559	53130817	DN70501_c2_g1
7	53131598	Regrowth/5	0.296178	53130603	53130833	DN92407_c3_g1
7	53131598	Regrowth/5	0.296178	53130854	53130568	DN92055_c5_g1
7	54377956	Green Matter/9, Dry Matter/3, Green Matter/3	0.123, 0.494, 0.316	54377699	54378060	DN77103_c1_g1	F-box protein SKIP24	GO:0005634, GO:0005886
7	54377956	Green Matter/9, Dry Matter/3, Green Matter/3	0.123, 0.494, 0.316	54378425	54377831	DN81386_c1_g1	F-box protein SKIP24	GO:0005634, GO:0005886
7	54377956	Green Matter/9, Dry Matter/3, Green Matter/3	0.123, 0.494, 0.316	54380492	54380798	DN69861_c2_g2
7	54377956	Green Matter/9, Dry Matter/3, Green Matter/3	0.123, 0.494, 0.316	54381259	54382150	DN70964_c3_g1
7	54380453	Green Matter/9, Dry Matter/3, Green Matter/3	0.123, 0.494, 0.316	54383819	54384110	DN90485_c1_g2
7	54380453	Green Matter/9, Dry Matter/3, Green Matter/3	0.123, 0.494, 0.316	54384128	54383825	DN92407_c3_g1
7	54380453	Green Matter/9, Dry Matter/3, Green Matter/3	0.494, 0.316	54385397	54385017	DN75652_c0_g2	NAC transcription factor 47 {ECO:0000305};NAC domain-containing protein 2;NAC transcription factor 56 {ECO:0000303|PubMed:15029955};NAC transcription factor NAM-B2;NAC transcription factor ONAC010;NAC transcription factor NAM-2	GO:0005634, GO:0003700, GO:0000976, GO:0009793, GO:0010365, GO:0009413, GO:0019900, GO:0071456, GO:0009788, GO:0009611, GO:0080060, GO:0045995, GO:0009753, GO:0048317, GO:0048731, GO:0003677, GO:0006355, GO:0048653
7	56928375	Dry Matter/2	0.180451	56927853	56929373	DN81954_c1_g1	Laccase-7	GO:0048046, GO:0005507, GO:0052716, GO:0016491
7	57318671	Stem Dry Matter/5	0.231166	57316152	57317025	DN86224_c1_g1	Cytochrome P450 94C1 {ECO:0000305}	GO:0005789, GO:0016021, GO:0043231, GO:0018685, GO:0020037, GO:0005506
7	57318671	Stem Dry Matter/5	0.231166	57316582	57315812	DN69510_c1_g1	Cytochrome P450 94C1 {ECO:0000305};Cytochrome P450 {ECO:0000250|UniProtKB:O81117}	GO:0005789, GO:0016021, GO:0043231, GO:0018685, GO:0020037, GO:0005506, GO:0009611, GO:0004497
7	57318671	Stem Dry Matter/5	0.231166	57316806	57315679	DN74642_c1_g1	Cytochrome P450 94C1 {ECO:0000305}	GO:0005789, GO:0016021, GO:0043231, GO:0018685, GO:0020037, GO:0005506
7	57318671	Stem Dry Matter/5	0.231166	57317141	57316457	DN71916_c0_g1	Cytochrome P450 94C1 {ECO:0000305}	GO:0005789, GO:0016021, GO:0043231, GO:0018685, GO:0020037, GO:0005506
7	57318671	Stem Dry Matter/5	0.231166	57317804	57318129	DN92072_c5_g1	Altered inheritance rate of mitochondria protein 25	GO:0005739, GO:0005886, GO:0017128, GO:0034605, GO:0034599
7	57318671	Stem Dry Matter/5	0.231166	57317806	57318135	DN59818_c2_g4
7	57318671	Stem Dry Matter/5	0.231166	57318077	57317809	DN59818_c2_g5
7	57318671	Stem Dry Matter/5	0.231166	57318101	57317840	DN61834_c4_g2
8	15859892	Dry Matter/6, Green Matter/6	0.212, 0.303	15857413	15857121	DN88838_c2_g2
8	15859892	Dry Matter/6, Green Matter/6	0.212, 0.303	15858125	15857411	DN85683_c0_g1
8	15859892	Dry Matter/6, Green Matter/6	0.212, 0.303	15859106	15858422	DN59956_c2_g1
8	37896003	Regrowth/5	0.159887	37900805	37899730	DN77486_c1_g1
8	39023791	Dry Matter/6, Green Matter/6	0.215, 0.253	39022061	39022357	DN65405_c2_g1
8	39023791	Dry Matter/6, Green Matter/6	0.215, 0.253	39022439	39022108	DN89584_c2_g4
8	39023791	Dry Matter/6, Green Matter/6	0.215, 0.253	39024960	39025299	DN91658_c2_g1
8	39023791	Dry Matter/6, Green Matter/6	0.215, 0.253	39025462	39024925	DN59875_c0_g2
8	39023791	Dry Matter/6, Green Matter/6	0.215, 0.253	39026234	39025903	DN79105_c0_g1
8	43907416	Green Matter/7	0.0622938	43904185	43904414	DN92413_c6_g1
8	43907416	Green Matter/7	0.0622938	43904640	43904324	DN90841_c2_g1
8	43907416	Green Matter/7	0.0622938	43905103	43904857	DN75855_c3_g1
8	43907416	Green Matter/7	0.0622938	43905306	43905673	DN86079_c2_g3
8	43907416	Green Matter/7	0.0622938	43905383	43905649	DN92413_c5_g1
8	43907416	Green Matter/7	0.0622938	43905469	43905788	DN59798_c2_g1
8	43907416	Green Matter/7	0.0622938	43905469	43905753	DN60624_c1_g1
8	51586400	Leaf Dry Matter/2	0.301975	51583525	51582885	DN71539_c0_g2
8	51586400	Leaf Dry Matter/2	0.301975	51587113	51587418	DN83969_c1_g2	Probable protein S-acyltransferase 19;Probable protein S-acyltransferase 20	GO:0005783, GO:0005794, GO:0016021, GO:0005886, GO:0019706, GO:0018230, GO:0006612
8	51586400	Leaf Dry Matter/2	0.301975	51589562	51590151	DN79785_c2_g1	Dihydroneopterin aldolase 1 {ECO:0000305}	GO:0005737, GO:0004150, GO:0046656, GO:0006760
8	51586400	Leaf Dry Matter/2	0.301975	51590571	51590035	DN79785_c2_g2	Dihydroneopterin aldolase 1 {ECO:0000305}	GO:0005737, GO:0004150, GO:0046656, GO:0006760
8	51586400	Leaf Dry Matter/2	0.301975	51591296	51590982	DN66068_c0_g2	Dihydroneopterin aldolase 1 {ECO:0000305};Dihydroneopterin aldolase 2 {ECO:0000305}	GO:0005737, GO:0004150, GO:0046656, GO:0006760
8	53956999	Regrowth/3	0.136001	53954409	53954959	DN71644_c0_g5
8	53956999	Regrowth/3	0.136001	53958430	53959303	DN80257_c0_g1	Mitochondrial import receptor subunit TOM9-2	GO:0016021, GO:0005742, GO:0005739, GO:0000325, GO:0009536, GO:0015450
8	53956999	Regrowth/3	0.136001	53960775	53961141	DN89705_c0_g1	Histone-lysine N-methyltransferase SUVR4;Probable inactive histone-lysine N-methyltransferase SUVR1;Probable inactive histone-lysine N-methyltransferase SUVR2	GO:0005694, GO:0005730, GO:0009506, GO:0018024, GO:0008270, GO:0006325, GO:0034968, GO:0042802, GO:0031047, GO:0005634
9	19780116	Green Matter/2	0.0692841	19779176	19779551	DN92411_c5_g2
9	19780116	Green Matter/2	0.0692841	19779418	19779104	DN91682_c3_g2	Phenylacetaldehyde reductase {ECO:0000303|PubMed:20650544};Cinnamoyl-CoA reductase 1 {ECO:0000303|PubMed:24985707, ECO:0000303|PubMed:25217505};Cinnamoyl-CoA reductase 1 {ECO:0000305};Tetraketide alpha-pyrone reductase 1	GO:0016491, GO:0005737, GO:0016621, GO:0000166, GO:0007623, GO:0010597, GO:0009809, GO:0009699, GO:0016616, GO:0006952, GO:0005783, GO:0005634, GO:0009555, GO:0010584, GO:0048316
9	19780116	Green Matter/2	0.0692841	19779551	19779239	DN92326_c7_g2
9	19780116	Green Matter/2	0.0692841	19780842	19780322	DN62073_c2_g1	DNA-binding protein RHL1	GO:0005730, GO:0003677, GO:0042023
9	19780116	Green Matter/2	0.0692841	19782323	19783017	DN62450_c0_g2
9	19780116	Green Matter/2	0.0692841	19782496	19782011	DN89834_c1_g1
9	19780116	Green Matter/2	0.0692841	19783051	19782773	DN62450_c0_g1
9	21047849	Stem Dry Matter/Total Sum	0.19784	21043035	21043308	DN61834_c4_g2
9	21047849	Stem Dry Matter/Total Sum	0.19784	21043061	21043327	DN59818_c2_g5
9	21047849	Stem Dry Matter/Total Sum	0.19784	21043315	21043010	DN92072_c5_g1	Altered inheritance rate of mitochondria protein 25	GO:0005739, GO:0005886, GO:0017128, GO:0034605, GO:0034599
9	21047849	Stem Dry Matter/Total Sum	0.19784	21043327	21043006	DN59818_c2_g4
9	21047849	Stem Dry Matter/Total Sum	0.19784	21046974	21045821	DN88525_c0_g3	Pre-mRNA-splicing factor syf2	GO:0071013, GO:0005634, GO:0071014, GO:0000974, GO:0071007
9	21047849	Stem Dry Matter/Total Sum	0.19784	21047992	21047514	DN88525_c0_g1
9	21047849	Stem Dry Matter/Total Sum	0.19784	21049096	21049797	DN91275_c1_g2
9	21047849	Stem Dry Matter/Total Sum	0.19784	21049666	21050979	DN74723_c0_g1
9	21047849	Stem Dry Matter/Total Sum	0.19784	21049925	21049500	DN74723_c0_g3
9	21047849	Stem Dry Matter/Total Sum	0.19784	21052383	21052910	DN59424_c0_g1
9	41402643	Regrowth/Total Sum	0.160875	41398940	41399653	DN89022_c1_g4
9	41402643	Regrowth/Total Sum	0.160875	41402256	41401712	DN88921_c1_g3
9	41402643	Regrowth/Total Sum	0.160875	41405269	41404845	DN91410_c2_g1
9	50511582	Green Matter/7, Green Matter/8, Green Matter/Total Sum	0.553, 0.317, 0.156	50510305	50509992	DN89722_c3_g3
9	50511582	Green Matter/7, Green Matter/8, Green Matter/Total Sum	0.554, 0.317, 0.156	50514195	50513877	DN74841_c0_g1	G-type lectin S-receptor-like serine/threonine-protein kinase SD2-5	GO:0016021, GO:0005886, GO:0005524, GO:0005516, GO:0030246, GO:0004672, GO:0106310, GO:0004674, GO:0004712, GO:0031625
9	50511582	Green Matter/7, Green Matter/8, Green Matter/Total Sum	0.554, 0.317, 0.156	50514347	50514699	DN90710_c2_g2	G-type lectin S-receptor-like serine/threonine-protein kinase SD2-5	GO:0016021, GO:0005886, GO:0005524, GO:0005516, GO:0030246, GO:0004672, GO:0106310, GO:0004674, GO:0004712, GO:0031625
Scaffold 89	16485	Regrowth/8	0.081392	16215	15985	DN64763_c1_g1	E3 ubiquitin-protein ligase SINAT5 {ECO:0000305}	GO:0005737, GO:0005634, GO:0061630, GO:0008270, GO:0016567
Scaffold 89	16485	Regrowth/8	0.081392	20419	20746	DN85080_c2_g2	Probable galactinol--sucrose galactosyltransferase 2	GO:0009506, GO:0016757, GO:0052692, GO:0034484
Scaffold 89	16485	Regrowth/8	0.081392	20515	20276	DN82730_c1_g1	Probable galactinol--sucrose galactosyltransferase 2	GO:0009506, GO:0016757, GO:0052692, GO:0034484
Scaffold 89	16485	Regrowth/8	0.081392	21454	21117	DN77042_c0_g6	Probable galactinol--sucrose galactosyltransferase 2	GO:0009506, GO:0016757, GO:0052692, GO:0034484, GO:0006979
Scaffold 365	37575	Stem Dry Matter/5	0.109538	34241	35502	DN63127_c0_g1
Scaffold 365	37575	Stem Dry Matter/5	0.109538	36899	37289	DN71748_c0_g2
Scaffold 365	37575	Stem Dry Matter/5	0.109538	40753	41026	DN89448_c0_g2
Scaffold 365	37575	Stem Dry Matter/5	0.109538	41041	40752	DN88340_c2_g3

## Sheet: Table S9
Supplementary Table S9. Count of sequencing reads pre- and postquality filtering procedures.
Sample	Library	Number of Raw Reads	Filtered Reads	Filtered Reads (%)
1	SRR8417281	148292760	135972832	91.7
2	SRR8417289	142004516	129537976	91.2
3	SRR8417290	144161184	131574900	91.3
4	SRR8417280	166628484	150736860	90.5
5	SRR8417287	153180772	140252060	91.6
6	SRR8417279	167171908	158219380	94.6
7	SRR8417288	154749616	142042352	91.8
8	SRR8417286	154998656	141191016	91.1
9	SRR8417283	162881616	147582888	90.6
10	SRR8417282	154189316	140215916	90.9
11	SRR8417291	143835128	131937544	91.7

## Sheet: Table S10
Supplementary Table S10. Biological process Gene Ontology (GO) enrichment analysis of genes physically linked to the major importance trait-associated markers.
Phenotype	Gini Importance	GO	Term	Annotated	Significant	Expected	P-Value
Dry Matter/4, Leaf Dry Matter/2	0.163, 0.302	GO:0046656	folic acid biosynthetic process	16	4	0.06	2.8e-07
Dry Matter/5, Green Matter/5, Green Matter/9, Leaf Dry Matter/5	0.133, 0.394, 0.119, 0.129	GO:0051555	flavonol biosynthetic process	19	4	0.07	5.8e-07
Dry Matter/5, Green Matter/5, Green Matter/9, Leaf Dry Matter/5	0.133, 0.394, 0.119, 0.129	GO:0010315	auxin efflux	40	4	0.14	1.3e-05
Regrowth/8	0.081	GO:0034484	raffinose catabolic process	21	3	0.08	5.8e-05
Stem Dry Matter/Total Sum	0.14835	GO:0010274	hydrotropism	7	2	0.03	0.00027
Stem Dry Matter/Total Sum	0.14835	GO:0001736	establishment of planar polarity	8	2	0.03	0.00036
Dry Matter/5, Green Matter/5, Green Matter/9, Leaf Dry Matter/5	0.133, 0.394, 0.119, 0.129	GO:0019305	dTDP-rhamnose biosynthetic process	10	2	0.04	0.00057
Stem Dry Matter/Total Sum	0.14835	GO:0032012	regulation of ARF protein signal transduction	13	2	0.05	0.00098
Dry Matter/2, Green Matter/2	0.248, 0.069	GO:0042023	DNA endoreduplication	56	3	0.2	0.00110
Dry Matter/3, Dry Matter/4, Dry Matter/7, Dry Matter/8, Dry Matter/Total Sum, Green Matter/2, Green Matter/4, Green Matter/Total Sum, Leaf Dry Matter/Total Sum, Regrowth/8, Regrowth/Total Sum	0.220, 0.258, 0.305, 0.218, 0.274, 0.069, 0.646, 0.228, 0.410, 0.426, 0.229	GO:0009809	lignin biosynthetic process	145	4	0.53	0.00189
Stem Dry Matter/Total Sum	0.14835	GO:0048209	regulation of vesicle targeting, to, from or within Golgi	19	2	0.07	0.00212
Regrowth/9	0.095	GO:0051017	actin filament bundle assembly	20	2	0.07	0.00235
Stem Dry Matter/Total Sum	0.14835	GO:0009942	longitudinal axis specification	21	2	0.08	0.00260
Green Matter/2, Stem Dry Matter/Total Sum	0.087, 0.148	GO:0070417	cellular response to cold	81	3	0.29	0.00317
Dry Matter/2	0.248	GO:0000082	G1/S transition of mitotic cell cycle	25	2	0.09	0.00367
Green Matter/3,	0.085	GO:1905582	response to mannose	33	2	0.12	0.00635
Stem Dry Matter/Total Sum	0.148	GO:0007155	cell adhesion	34	2	0.12	0.00673
Dry Matter/Total Sum, Green Matter/8	0.129, 0.439	GO:0019374	galactolipid metabolic process	37	2	0.13	0.00793

[truncated: 6 more sheets: Table S11, Table S12, Table S13, Table S14, Table S15, Table S16]
